# Supplementary material for: Electrophotoredox cerium-catalyzed decarboxylative radical cyclization cascade for the synthesis of alkylated benzimidazo-fused isoquinolinones
Source: Royal Society of Chemistry journal article supplement (doi:10.1039/d4cy00016a), 2024-01-01
Supplement: d4cy00016a1.pdf [file d4cy00016a1.pdf]

## Supporting Information

# Electrophotoredox Cerium-catalyzed Decarboxylative Radical Cyclization Cascade for the Synthesis of Alkylated Benzimidazo-fused Isoquinolinones

Meng Wang,<sup>a</sup> Dehui Wang,<sup>a</sup> Kun Xu<sup>a,\*</sup> and Chengchu Zeng<sup>a,\*</sup>

<sup>a</sup> *College of Chemistry and Life Science, Beijing University of Technology, Beijing 100124, China.*

kunxu@bjut.edu.cn; zengcc@bjut.edu.cn

|                                                                                                              |     |
|--------------------------------------------------------------------------------------------------------------|-----|
| <b>1. General information</b> .....                                                                          | S1  |
| <b>2. General procedure for the synthesis of starting materials</b> .....                                    | S1  |
| <b>3. General procedure for the synthesis of 3-27</b> .....                                                  | S2  |
| <b>4. CV experiments using n-Bu<sub>4</sub>NI or n-Bu<sub>4</sub>NBr as the supporting electrolyte</b> ..... | S3  |
| <b>5. A photo of the reaction setup</b> .....                                                                | S3  |
| <b>6. Characterization data of 3-27</b> .....                                                                | S4  |
| <b>7. Spectra of prepared compounds</b> .....                                                                | S15 |
| <b>8. References</b> .....                                                                                   | S40 |

## 1. General information

Unless otherwise special indicated, all the reagents were purchased from commercial supplies unless otherwise stated. And all the solvents were used without any purification. Thin-layer chromatography (TLC) was performed on plastic plates coated with silica gel GF254 with 0.2 mm thickness (Yantai Yuanbo Biological Technology Co., Ltd.) and all compounds were visualized with a UV light at 254 nm. Flash column chromatography was performed using silica gel (200-300 mesh, Yantai Yuanbo Biological Technology Co., Ltd.). NMR spectra were recorded on a Bruker Avance III spectrometer operating at 600 MHz ( $^1\text{H}$  NMR) and 150 MHz ( $^{13}\text{C}$  NMR) or at 300 MHz ( $^1\text{H}$  NMR) and 75 MHz ( $^{13}\text{C}$  NMR). Chemical shifts were reported in ppm downfield and referenced as follows:  $^1\text{H}$ : residual internal  $\text{CHCl}_3$  ( $\delta$  7.26 ppm);  $^{13}\text{C}$ : internal  $\text{CDCl}_3$  ( $\delta$  77.2 ppm). Coupling constants were quoted in Hz(*J*). Multiplicity was indicated as follows: s (singlet), d (doublet), t (triplet), q (quartet), m (multiplet).

## 2. General procedure for the synthesis of starting materials

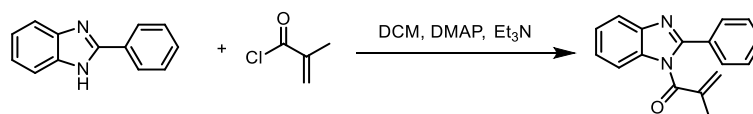

The alkene substrates were known compounds, and were synthesized according to the literature procedures<sup>[1,2,3]</sup>. To the solution of benzimidazole (5 mmol, 1 equiv.) and DMAP (2.0 mmol, 0.4 equiv) in DCM was added Et<sub>3</sub>N (10 mmol, 2.0 equiv) at 0 °C. Then, methacryloyl chloride (10 mmol, 2.0 equiv) was slowly added to the solution. The solution was warmed up to room temperature and stirred for 10 h. The mixture was diluted with DCM (20 mL) and saturated NaCl aqueous solution (20 mL). The organic and aqueous layers were separated. The aqueous layer was extracted with DCM (20 mL x 3 times). The combined organic layer was washed with brine, dried over Na<sub>2</sub>SO<sub>4</sub>. After evaporation of solvent, the crude product was purified by column chromatography on silica gel using petroleum ether/ethyl acetate (20:1-6:1) as the eluent.

### 3. General procedure for the synthesis of 3-27

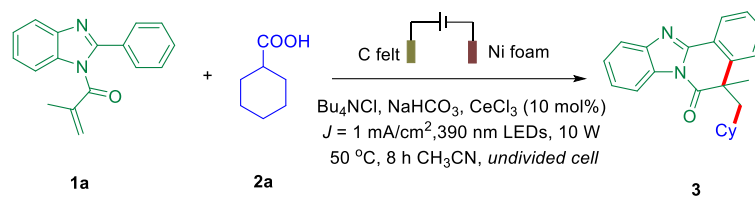

An undivided cell was equipped with a carbon felt anode ( $1.0 \times 3.0 \text{ cm}^2$ ) and a nickel foam cathode ( $1.0 \times 3.0 \text{ cm}^2$ ). To the cell was added **1a** (0.3 mmol), **2a** (1.5 mmol),  $\text{NaHCO}_3$  (0.5 mmol),  $\text{CeCl}_3$  (0.03 mmol, 10 mol %), *n*- $\text{Bu}_4\text{NCl}$  (0.3 mmol) and  $\text{CH}_3\text{CN}$  (10 mL) sequentially. The reaction cell was placed 0.5 cm away from the LEDs (Kessil, 390 nm, 10 W). Then, the resulting mixture was electrolyzed under constant current conditions ( $1 \text{ mA/cm}^2$ ) at  $50^\circ\text{C}$  under light irradiation (390 nm, 10 W). After the reaction (8 h), the solvent was removed by distillation. The product was then extracted with DCM ( $3 \times 20 \text{ mL}$ ), dried over  $\text{Na}_2\text{SO}_4$ , and concentrated in vacuo. The residue was purified by column chromatography on silica gel to afford the desired pure product.

#### 4. CV experiments using *n*-Bu<sub>4</sub>NI or *n*-Bu<sub>4</sub>NBr as the supporting electrolyte

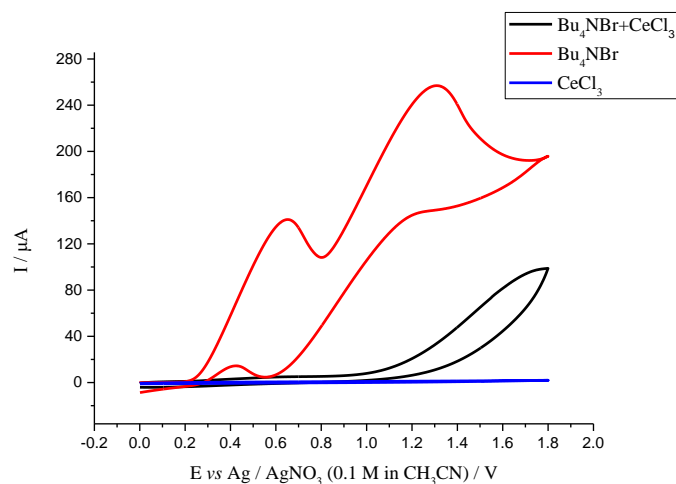

**Figure S1.** CV experiments. CV of related compound at a platinum disk electrode in CH<sub>3</sub>CN at a scan rate of 0.1 Vs<sup>-1</sup>: CeCl<sub>3</sub> (3 mM), *n*-Bu<sub>4</sub>NBr (9 mM), CeCl<sub>3</sub> (3 mM) + *n*-Bu<sub>4</sub>NBr (9 mM).

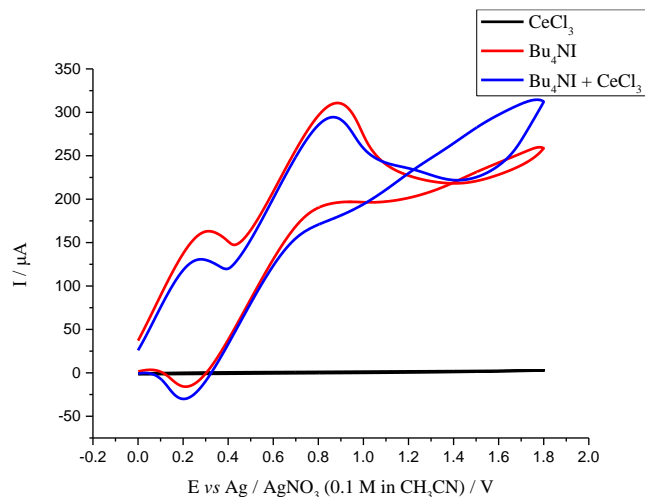

**Figure S2.** CV experiments. CV of related compound at a platinum disk electrode in CH<sub>3</sub>CN at a scan rate of 0.1 Vs<sup>-1</sup>: CeCl<sub>3</sub> (3 mM), *n*-Bu<sub>4</sub>NI (9 mM), CeCl<sub>3</sub> (3 mM) + *n*-Bu<sub>4</sub>NI (9 mM).

#### 5. A photo of the reaction setup

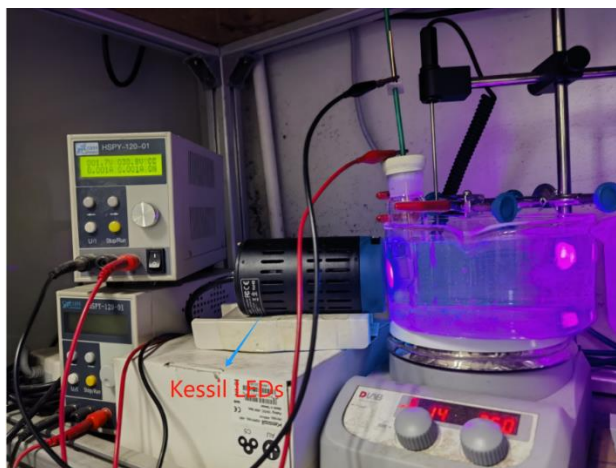

## 6. Characterization data of 3-27

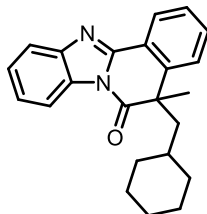

**5-(cyclohexylmethyl)-5-methylbenzo[4,5]imidazo[2,1-a]isoquinolin-6(5H)-one (3)**<sup>[3]</sup>, white solid (89.2 mg, 86%). <sup>1</sup>H NMR (600 MHz, CDCl<sub>3</sub>) δ 8.49 (d, *J* = 7.7 Hz, 1H), 8.38 (d, *J* = 7.4 Hz, 1H), 7.83 (d, *J* = 7.4 Hz, 1H), 7.57 (t, *J* = 7.5 Hz, 1H), 7.49 – 7.42 (m, 4H), 2.50 – 2.47 (m, 1H), 2.06 (d, 4.4 Hz, 1H), 1.72 (s, 1H), 1.67 (s, 3H), 1.48 – 1.37 (m, 3H), 1.26 (s, 2H), 1.17 (s, 1H), 0.99 (s, 1H), 0.94 (d, *J* = 9.6 Hz, 2H), 0.80 (s, 1H). <sup>13</sup>C NMR (150 MHz, CDCl<sub>3</sub>) δ 173.7, 145.0, 144.2, 142.0, 131.8, 127.7, 126.7, 126.09, 125.96, 125.6, 122.7, 119.9, 115.9, 77.4, 77.2, 77.0, 49.0, 48.5, 35.1, 34.4, 33.1, 31.9, 26.1.

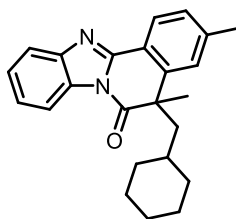

**6-(cyclohexylmethyl)-3,5-dimethylbenzo[4,5]imidazo[2,1-a]isoquinolin-6(5H)-one (4)**<sup>[4]</sup>, white solid (47.3 mg, 44%). <sup>1</sup>H NMR (600 MHz, CDCl<sub>3</sub>) δ 8.37 (d, *J* = 7.1 Hz, 2H), 7.81 (d, *J* = 7.3 Hz, 1H), 7.47 – 7.38 (m, 2H), 7.30 (d, *J* = 7.7 Hz, 1H), 7.26 (s, 1H), 2.48 (s, 3H), 2.46 – 2.44 (m, 1H), 2.05 (d, *J* = 14.3 Hz, 1H), 1.65 (s, 3H), 1.47 (s, 1H), 1.43 – 1.36 (m, 2H), 1.28 (s, 1H), 1.16 (s, 1H), 0.99 (s, 1H), 0.94 (s, 2H), 0.80 (s, 3H). <sup>13</sup>C NMR (150 MHz, CDCl<sub>3</sub>) δ 173.8, 150.1, 144.1, 142.2, 141.9, 131.4, 128.7, 127.0, 125.9, 125.8, 125.3, 119.9, 119.6, 115.8, 77.3, 77.1, 76.9, 48.8, 48.2, 34.9, 34.3, 32.9, 31.9, 26.0, 25.94, 25.92, 22.1.

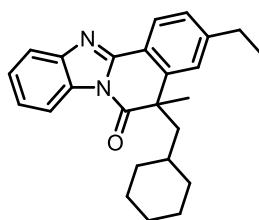

**6-(cyclohexylmethyl)-3-ethyl-5-methylbenzo[4,5]imidazo[2,1-a]isoquinolin-6(5H)-one (5)**<sup>[5]</sup>, white solid (45.8 mg, 41%). <sup>1</sup>H NMR (600 MHz, CDCl<sub>3</sub>) δ 8.44 – 8.34 (m, 2H), 7.82 (d, J = 7.6 Hz, 1H), 7.51 – 7.41 (m, 2H), 7.33 (d, J = 8.0 Hz, 1H), 7.26 (s, 1H), 2.77 (d, J = 7.8 Hz, 2H), 2.46 (d, J = 14.2 Hz, 1H), 2.08 – 2.04 (m, 1H), 1.66 (s, 3H), 1.48 – 1.44 (m, 1H), 1.40 (s, 2H), 1.31 (t, J = 7.7 Hz, 3H), 1.25 (s, 2H), 1.18 (s, 1H), 0.98 (s, 1H), 0.94 (d, J = 10.1 Hz, 1H), 0.81 (d, J = 8.1 Hz, 3H). <sup>13</sup>C NMR (150 MHz, CDCl<sub>3</sub>) δ 173.8, 150.1, 148.4, 144.1, 142.0, 131.4, 127.5, 126.0, 125.9, 125.8, 125.3, 120.1, 119.6, 115.8, 77.3, 77.1, 76.9, 48.8, 48.4, 34.9, 34.3, 33.0, 31.8, 29.3, 26.0, 25.94, 25.90, 15.5.

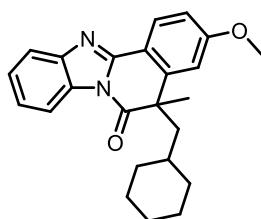

**5-(cyclohexylmethyl)-3-methoxy-5-methylbenzo[4,5]imidazo[2,1-a]isoquinolin-6(5H)-one (6)**<sup>[5]</sup>, white solid (106.6 mg, 95%). <sup>1</sup>H NMR (600 MHz, CDCl<sub>3</sub>) δ 8.56 (d, J = 8.2 Hz, 1H), 8.42 – 8.37 (m, 1H), 8.15 (d, J = 1.4 Hz, 1H), 8.15 – 8.15 (m, 2H), 7.89 – 7.83 (m, 1H), 7.51 – 7.44 (m, 2H), 4.00 (s, 3H), 2.50 (d, J = 14.4 Hz, 1H), 2.13 (d, J = 14.4 Hz, 1H), 1.70 (s, 3H), 1.47 – 1.37 (m, 3H), 1.24 – 1.15 (m, 2H), 0.96 – 0.90 (m, 3H), 0.84 – 0.76 (m, 3H). <sup>13</sup>C NMR (150 MHz, CDCl<sub>3</sub>) δ 173.0, 166.3, 148.8, 144.1, 142.1, 132.7, 131.5, 128.4, 128.1, 126.4, 126.14, 126.07, 120.10, 115.9, 77.2, 77.0, 76.8, 52.6, 48.9, 48.5, 35.0, 34.2, 33.0, 31.6, 25.9.

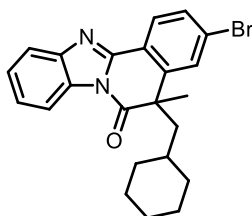

**3-bromo-5-(cyclohexylmethyl)-5-methylbenzo[4,5]imidazo[2,1-a]isoquinolin-6(5H)-one (7)**<sup>[5]</sup>, white solid (62.2 mg, 49%). <sup>1</sup>H NMR (600 MHz, CDCl<sub>3</sub>) <sup>1</sup>H NMR (600 MHz, Chloroform-*d*) δ 8.43 – 8.30 (m, 2H), 7.83 (d, J = 5.6 Hz, 1H), 7.66 – 7.57 (m, 2H), 7.46 (s, 2H), 2.49 (d, J = 14.5 Hz, 1H), 2.04 – 1.97 (m, 1H), 1.66 (s, 3H), 1.49 (s, 1H), 1.43-1.

39 (m, 2H), 1.25 (s, 3H), 0.98 – 0.95 (m, 2H), 0.84 – 0.81 (m, 3H).  $^{13}\text{C}$  NMR (150 MHz,  $\text{CDCl}_3$ )  $\delta$  172.7, 149.0, 144.0, 143.7, 131.4, 131.1, 129.8, 127.5, 126.3, 126.1, 125.8, 121.6, 119.8, 115.8, 77.3, 77.1, 76.9, 48.8, 48.3, 34.9, 34.2, 32.9, 31.8, 29.7, 25.94, 25.87.

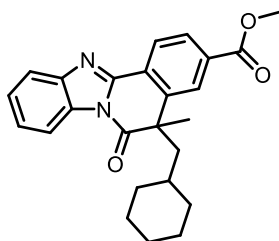

**Methyl 5-(cyclohexylmethyl)-5-methyl-6-oxo-5,6-dihydrobenzo[4,5]imidazo[2,1-a]isoquinoline-3-carboxylate (8)**<sup>[4]</sup>, white solid (59.2 mg, 49%).  $^1\text{H}$  NMR (600 MHz,  $\text{CDCl}_3$ )  $\delta$  8.56 (d,  $J = 8.1$  Hz, 1H), 8.39 (d,  $J = 4.8$  Hz, 1H), 8.13 (d,  $J = 14.2$  Hz, 2H), 7.86 (s, 1H), 7.50 – 7.45 (m, 2H), 3.99 (s, 3H), 2.52 – 2.48 (d, 8.1 Hz, 1H), 2.14 (d,  $J = 14.1$  Hz, 1H), 1.69 (s, 3H), 1.44 (d,  $J = 10.6$  Hz, 1H), 1.39 (t,  $J = 13.0$  Hz, 2H), 1.25 (s, 1H), 1.14 (s, 1H), 0.94 – 0.89 (m, 3H), 0.81 – 0.77 (m, 3H).  $^{13}\text{C}$  NMR (150 MHz,  $\text{CDCl}_3$ )  $\delta$  173.1, 166.3, 148.8, 144.1, 142.0, 132.7, 131.5, 128.4, 128.1, 126.4, 126.2, 126.1, 120.1, 115.9, 77.3, 77.1, 76.8, 52.7, 48.8, 48.5, 35.0, 34.2, 32.9, 31.7, 29.7, 25.92, 25.90, 25.85.

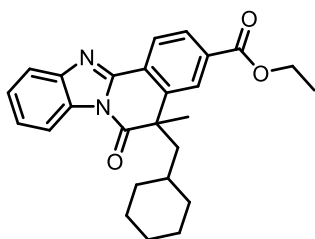

**ethyl 5-(cyclohexylmethyl)-5-methyl-6-oxo-5,6-dihydrobenzo[4,5]imidazo[2,1-a]isoquinoline-3-carboxylate (9)**, white solid (68.7 mg, 55%), m.p. 165-166 °C.  $^1\text{H}$  NMR (600 MHz,  $\text{CDCl}_3$ )  $\delta$  8.56 (d,  $J = 8.0$  Hz, 1H), 8.45 – 8.35 (m, 1H), 8.16 (s, 1H), 8.13 (d,  $J = 7.8$  Hz, 1H), 7.87 (s, 1H), 7.48 (s, 2H), 4.46 (s, 2H), 2.59 – 2.44 (m, 1H), 2.14 (d,  $J = 14.6$  Hz, 1H), 1.71 (s, 3H), 1.46 (s, 4H), 1.40 (t,  $J = 12.7$  Hz, 2H), 1.26 (s, 1H), 1.16 (d,  $J = 8.7$  Hz, 1H), 1.02 – 0.89 (m, 3H), 0.85 – 0.79 (s, 3H).  $^{13}\text{C}$  NMR (150 MHz,  $\text{CDCl}_3$ )  $\delta$  173.1, 165.8, 148.8, 144.1, 142.0, 133.0, 131.5, 128.4, 128.1, 126.3, 126.1, 126.0, 120.1, 115.9, 77.3, 77.1, 76.8, 61.6, 48.8, 48.5, 35.0, 34.2, 32.9, 31.7, 25.9, 14.4. HRMS (APCI)  $m/z$ :  $[\text{M} + \text{H}]^+$  calculated for  $\text{C}_{26}\text{H}_{29}\text{N}_2\text{O}_3^+$  417.2173, Found 417.2170.

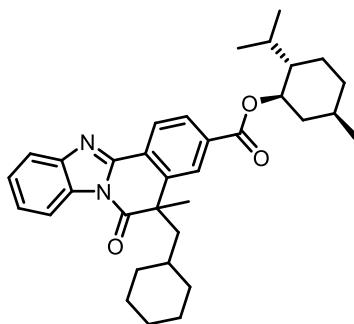

**(1R,2S,5R)-2-isopropyl-5-methylcyclohexyl 5-(cyclohexylmethyl)-5-methyl-6-oxo-5,6-dihydrobenzo[4,5]imidazo[2,1-a]isoquinoline-3-carboxylate (10)**<sup>[4]</sup>, white solid (56.9 mg, 36%). <sup>1</sup>H NMR (600 MHz, CDCl<sub>3</sub>) δ 8.55 (d, J = 7.2 Hz, 1H), 8.40 (d, J = 4.8 Hz, 1H), 8.14 – 8.10 (m, 2H), 7.87 (d, J = 5.3 Hz, 1H), 7.48 (d, J = 3.3 Hz, 2H), 4.99 (t, J = 11.3 Hz, 1H), 2.59 – 2.44 (m, 1H), 2.20 – 2.13 (m, 2H), 2.10 – 1.96 (m, 1H), 1.76 (s, 2H), 1.70 (s, 3H), 1.63 – 1.61 (m, 3H), 1.47 (s, 1H), 1.42 – 1.40 (m, 2H), 1.29 – 1.26 (m, 3H), 1.18 – 1.15 (m, 1H), 0.96 (s, 9H), 0.84 – 0.79 (m, 6H). <sup>13</sup>C NMR (150 MHz, CDCl<sub>3</sub>) δ 173.5, 165.7, 149.2, 144.4, 142.4, 133.8, 133.6, 131.8, 128.7, 128.6, 128.5, 128.4, 126.4, 120.4, 116.3, 77.6, 77.4, 77.2, 76.1, 48.8, 47.6, 41.2, 35.2, 34.6, 34.5, 33.3, 32.4, 31.8, 30.1, 27.2, 27.0, 26.2, 24.0, 22.4, 21.1, 17.2, 17.0.

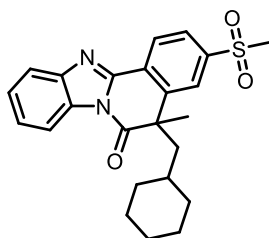

**5-(cyclohexylmethyl)-5-methyl-3-(methylsulfonyl)benzo[4,5]imidazo[2,1-a]isoquinolin-6(5H)-one (11)**<sup>[2]</sup>, white solid (95.3 mg, 75%). <sup>1</sup>H NMR (600 MHz, CDCl<sub>3</sub>) δ 8.71 (d, J = 7.6 Hz, 1H), 8.40 (d, J = 4.3 Hz, 1H), 8.06 (s, 1H), 8.03 (d, J = 8.6 Hz, 1H), 7.89 (s, 1H), 7.51 (d, J = 3.3 Hz, 2H), 3.15 (s, 3H), 2.53 (d, J = 14.1 Hz, 1H), 2.12 (d, J = 14.3 Hz, 1H), 1.72 (s, 3H), 1.48 – 1.38 (m, 3H), 1.29 – 1.15 (m, 3H), 0.95 – 0.94 (m, 2H), 0.85 – 0.75 (m, 3H). <sup>13</sup>C NMR (150 MHz, CDCl<sub>3</sub>) δ 172.2, 147.8, 144.0, 143.2, 142.8, 131.4, 127.4, 127.2, 126.6, 126.4, 126.3, 126.0, 120.3, 116.0, 77.3, 77.1, 76.9, 48.8, 48.7, 44.5, 35.1, 34.2, 33.0, 31.5, 25.9, 25.83, 25.77.



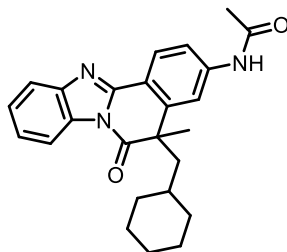

**N-(5-(cyclohexylmethyl)-5-methyl-6-oxo-5,6-dihydrobenzo[4,5]imidazo[2,1-a]isoquinolin-3-yl)acetamide (12)**<sup>[5]</sup>, white solid (79.4 mg, 66%). <sup>1</sup>H NMR (600 MHz, CDCl<sub>3</sub>) δ 8.42 (d, *J* = 8.5 Hz, 1H), 8.36 (d, *J* = 7.6 Hz, 1H), 7.91 (s, 1H), 7.80 (d, *J* = 9.5 Hz, 1H), 7.52 (s, 1H), 7.47 (d, *J* = 9.1 Hz, 1H), 7.42 (d, *J* = 9.1 Hz, 1H), 2.51 – 2.43 (m, 1H), 2.26 (s, 3H), 2.06 (d, *J* = 14.7 Hz, 1H), 1.66 (s, 3H), 1.47 – 1.40 (d, *J* = 39.0 Hz, 2H), 1.29 (d, *J* = 11.3 Hz, 2H), 1.17 (s, 1H), 1.02 (s, 1H), 0.94 – 0.91 (m, 2H), 0.82 – 0.80 (m, 2H). <sup>13</sup>C NMR (150 MHz, CDCl<sub>3</sub>) δ 173.5, 168.6, 149.6, 143.4, 141.1, 131.4, 126.9, 125.9, 125.4, 119.5, 118.7, 117.0, 115.8, 77.3, 77.1, 76.8, 48.8, 48.6, 34.9, 34.2, 32.9, 31.9, 29.7, 25.9, 25.0.

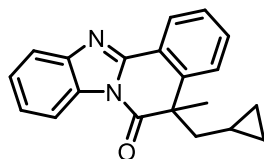

**5-(cyclopropylmethyl)-5-methylbenzo[4,5]imidazo[2,1-a]isoquinolin-6(5H)-one (13)**<sup>[3]</sup>, white solid (51.6 mg, 57%). <sup>1</sup>H NMR (600 MHz, CDCl<sub>3</sub>) δ 8.49 (d, *J* = 7.9 Hz, 1H), 8.38 (d, *J* = 6.9 Hz, 1H), 7.83 (d, *J* = 6.9 Hz, 1H), 7.58 (t, *J* = 8.2 Hz, 1H), 7.50 (d, *J* = 8.1 Hz, 2H), 7.45 – 7.41 (m, 2H), 2.20 – 2.16 (m, 1H), 2.02 – 1.99 (m, 1H), 1.77 (s, 3H), 0.20 – 0.13 (m, 1H), 0.19 – 0.14 (m, 1H), -0.04 – -0.10 (m, 2H), -0.21 – -0.25 (m, 1H). <sup>13</sup>C NMR (150 MHz, CDCl<sub>3</sub>) δ 173.8, 150.3, 144.2, 142.2, 131.8, 131.6, 127.8, 126.4, 125.9, 125.7, 123.4, 119.9, 115.7, 77.4, 77.2, 77.0, 49.9, 49.7, 27.0, 7.00, 4.0, 3.8.

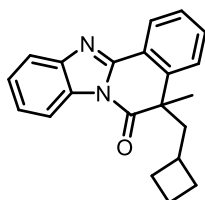

**5-(cyclobutylmethyl)-5-methylbenzo[4,5]imidazo[2,1-a]isoquinolin-6(5H)-one (14)**<sup>[3]</sup>, white solid (42.7 mg, 45%). <sup>1</sup>H NMR (600 MHz, CDCl<sub>3</sub>) δ 8.47 (d, *J* = 7.6 Hz, 1H), 8.36 (d, *J* = 7.2 Hz, 1H), 7.82 (d, *J* = 7.3 Hz, 1H), 7.60 – 7.53 (m, 1H), 7.47 (t, *J* = 7.1 Hz,

2H), 7.43 (pd,  $J = 7.3, 1.3$  Hz, 2H), 2.47 (m, 1H), 2.08 (m, 1H), 1.88 – 1.83 (m, 1H), 1.74 (s, 3H), 1.51 – 1.42 (m, 5H), 1.33 – 1.27 (m, 1H).  $^{13}\text{C}$  NMR (150 MHz,  $\text{CDCl}_3$ )  $\delta$  173.3, 150.0, 144.1, 141.8, 131.6, 131.4, 127.6, 126.5, 125.82, 125.75, 125.5, 122.9, 119.8, 115.7, 77.3, 77.0, 76.8, 51.3, 48.6, 32.9, 28.9, 28.5, 27.9, 18.6.

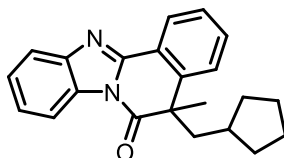

**5-(cyclopentylmethyl)-5-methylbenzo[4,5]imidazo[2,1-a]isoquinolin-6(5H)-one (15)**<sup>[3]</sup>, white solid (54.5 mg, 55%).  $^1\text{H}$  NMR (600 MHz,  $\text{CDCl}_3$ )  $\delta$  8.49 (d,  $J = 8.1$  Hz, 1H), 8.39 (d,  $J = 7.3$  Hz, 1H), 7.83 (d,  $J = 7.6$  Hz, 1H), 7.57 (t,  $J = 7.6$  Hz, 1H), 7.48 (d,  $J = 8.0$  Hz, 2H), 7.43 (q,  $J = 7.2$  Hz, 2H), 2.54 – 2.51 (m, 1H), 2.20 – 2.17 (m, 1H), 1.73 (s, 3H), 1.40 – 1.29 (m, 3H), 1.25 – 1.16 (m, 4H), 0.98 – 0.92 (m, 1H), 0.83 – 0.76 (m, 1H).  $^{13}\text{C}$  NMR (150 MHz,  $\text{CDCl}_3$ )  $\delta$  173.6, 149.9, 144.1, 142.1, 131.6, 131.4, 127.6, 126.6, 125.9, 125.5, 122.8, 119.8, 115.8, 77.3, 77.0, 76.8, 49.2, 49.1, 37.5, 33.6, 32.4, 30.1, 24.9, 24.6.

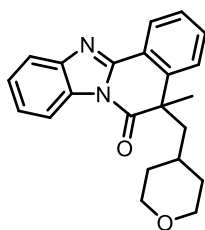

**5-methyl-5-((tetrahydro-2H-pyran-4-yl)methyl)benzo[4,5]imidazo[2,1-a]isoquinolin-6(5H)-one (16)**<sup>[5]</sup>, white solid (55.3 mg, 53%).  $^1\text{H}$  NMR (600 MHz,  $\text{CDCl}_3$ )  $\delta$  8.50 (d,  $J = 7.8$ , Hz, 1H), 8.38 (d,  $J = 6.9$  Hz, 1H), 7.84 (d,  $J = 6.9$  Hz, 1H), 7.60 – 7.57 (m, 1H), 7.51 – 7.47 (m, 2H), 7.47 – 7.43 (m, 2H), 3.75 – 3.61 (m, 2H), 3.03 (t,  $J = 11.6$  Hz, 1H), 2.97 (t,  $J = 11.5$  Hz, 1H), 2.56 – 2.52 (m, 1H), 2.11 (d,  $J = 14.4$  Hz, 1H), 1.69 (s, 3H), 1.26 – 1.21 (m, 2H), 1.17 – 1.03 (m, 3H).  $^{13}\text{C}$  NMR (150 MHz,  $\text{CDCl}_3$ )  $\delta$  173.2, 149.6, 144.1, 141.6, 131.8, 131.4, 127.8, 126.5, 126.1, 126.0, 125.7, 122.6, 119.8, 115.8, 77.3, 77.0, 76.8, 67.5, 48.5, 48.2, 33.8, 32.9, 32.5, 31.7.

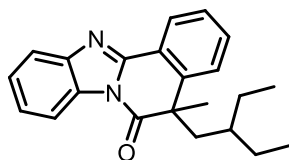

**5-(2-ethylbutyl)-5-methylbenzo[4,5]imidazo[2,1-a]isoquinolin-6(5H)-one (17)**<sup>[3]</sup>, yellow oil (59.9 mg, 60%). <sup>1</sup>H NMR (600 MHz, CDCl<sub>3</sub>) 1H NMR (600 MHz, Chloroform-d) δ 8.51 – 8.46 (m, 1H), 8.40 – 8.34 (m, 1H), 7.83 (d, *J* = 7.4 Hz, 1H), 7.57 (t, *J* = 7.5 Hz, 1H), 7.50 – 7.41 (m, 4H), 2.42 – 2.39 (m, 1H), 2.02 – 1.99 (m, 1H), 1.73 (s, 3H), 0.99 – 0.88 (m, 5H), 0.59 – 0.53 (m, 5H). <sup>13</sup>C NMR (150 MHz, CDCl<sub>3</sub>) δ 173.5, 149.9, 144.1, 141.9, 131.9, 131.6, 127.6, 126.7, 125.85, 125.82, 125.5, 122.9, 119.7, 115.7, 77.2, 77.0, 76.8, 48.7, 46.4, 37.3, 29.9, 25.8, 25.3, 10.3, 10.0.

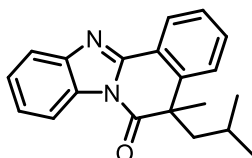

**6-isobutyl-5-methylbenzo[4,5]imidazo[2,1-a]isoquinolin-6(5H)-one (18)**<sup>[3]</sup>, yellow oil (64.8 mg, 71%). <sup>1</sup>H NMR (600 MHz, CDCl<sub>3</sub>) δ 8.50 (d, *J* = 7.6 Hz, 1H), 8.39 (d, *J* = 7.2 Hz, 1H), 7.83 (d, *J* = 7.1 Hz, 1H), 7.57 (t, *J* = 7.6 Hz, 1H), 7.51 – 7.41 (m, 4H), 2.48 – 2.44 (m, 1H), 2.10 – 2.06 (m, 1H), 1.69 (s, 3H), 1.33 – 1.27 (m, 1H), 0.63 (d, *J* = 6.7 Hz, 3H), 0.57 (d, *J* = 6.6 Hz, 3H). <sup>13</sup>C NMR (150 MHz, CDCl<sub>3</sub>) δ 173.6, 149.8, 144.1, 141.8, 131.6, 131.4, 127.6, 126.6, 126.0, 125.9, 125.5, 122.8, 119.8, 115.8, 77.3, 77.0, 76.8, 50.6, 48.6, 31.4, 25.7, 23.9, 22.4.

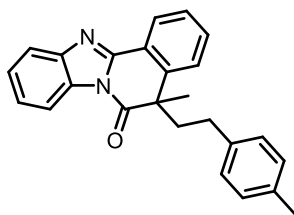

**5-methyl-5-(4-methylphenethyl)benzo[4,5]imidazo[2,1-a]isoquinolin-6(5H)-one (19)**<sup>[6]</sup>, white solid (56.2 mg, 51%). <sup>1</sup>H NMR (600 MHz, CDCl<sub>3</sub>) δ 8.51 (d, *J* = 7.0 Hz, 1H), 8.27 (d, *J* = 7.2 Hz, 1H), 7.81 (d, *J* = 7.3 Hz, 1H), 7.62 (t, *J* = 8.2 Hz, 1H), 7.52 (d, *J* = 7.5 Hz, 2H), 7.44 – 7.38 (m, 3H), 6.85 (d, *J* = 7.8 Hz, 2H), 6.77 (d, *J* = 7.9 Hz, 2H), 2.85 – 2.79 (m, 1H), 2.37 – 2.14 (m, 4H), 2.08 (s, 3H), 1.75 (s, 1H), 1.73 (s, 3H). <sup>13</sup>C

**NMR (150 MHz, CDCl<sub>3</sub>)**  $\delta$  173.0, 149.8, 144.0, 141.4, 136.8, 135.7, 131.9, 131.3, 128.8, 128.1, 127.8, 126.1, 126.0, 125.8, 125.4, 123.3, 119.7, 115.7, 77.3, 77.0, 76.8, 49.1, 44.3, 31.2, 29.7, 29.0, 20.8.

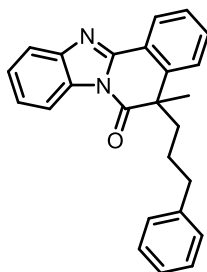

**5-methyl-5-(3-phenylpropyl)benzo[4,5]imidazo[2,1-a]isoquinolin-6(5H)-one (20)**<sup>[2]</sup>, white solid (59.3 mg, 54%). **<sup>1</sup>H NMR (600 MHz, CDCl<sub>3</sub>)**  $\delta$  8.47 (d, J = 7.8 Hz, 1H), 8.37 (d, J = 6.6 Hz, 1H), 7.81 (d, J = 6.5 Hz, 1H), 7.55 – 7.52 (m, 1H), 7.48 – 7.45 (m, 1H), 7.44 – 7.41 (m, 2H), 7.36 (d, J = 7.7 Hz, 1H), 7.17 (t, J = 7.4 Hz, 2H), 7.11 (t, J = 7.3 Hz, 1H), 6.95 (d, J = 7.2 Hz, 2H), 2.55 – 2.50 (m, 1H), 2.45 – 2.41 (m, 1H), 2.03 – 1.98 (m, 1H), 1.74 (s, 1H), 1.69 (s, 3H), 1.36 – 1.29 (m, 1H), 1.19 – 1.11 (m, 1H). **<sup>13</sup>C NMR (150 MHz, CDCl<sub>3</sub>)**  $\delta$  173.3, 149.9, 144.1, 141.6, 141.2, 131.9, 131.3, 128.29, 128.27, 128.25, 127.7, 126.0, 125.92, 125.90, 125.6, 123.0, 119.8, 115.7, 77.3, 77.1, 76.9, 49.4, 42.2, 35.6, 29.2, 26.6.

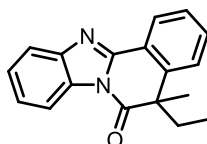

**5-ethyl-5-methylbenzo[4,5]imidazo[2,1-a]isoquinolin-6(5H)-one (21)**<sup>[3]</sup>, white solid (53.8 mg, 65%). **<sup>1</sup>H NMR (300 MHz, CDCl<sub>3</sub>)**  $\delta$  8.52 – 8.45 (m, 1H), 8.40 – 8.33 (m, 1H), 7.86 – 7.79 (m, 1H), 7.61 – 7.55 (m, 1H), 7.52 – 7.40 (m, 4H), 2.51 – 2.39 (m, 1H), 2.06 – 1.96 (m, 1H), 1.74 (s, 3H), 0.58 (t, J = 7.4 Hz, 3H). **<sup>13</sup>C NMR (75 MHz, CDCl<sub>3</sub>)**  $\delta$  173.4, 150.0, 144.1, 141.6, 131.9, 131.3, 127.7, 126.1, 125.9, 125.8, 125.5, 123.3, 119.8, 115.7, 77.5, 77.0, 76.6, 50.1, 36.4, 28.3, 9.6.

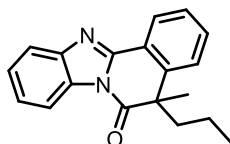

**5-methyl-5-propylbenzo[4,5]imidazo[2,1-a]isoquinolin-6(5H)-one (22)**<sup>[3]</sup>, white solid (53.9 mg, 62%). <sup>1</sup>H NMR (300 MHz, CDCl<sub>3</sub>) δ 8.51 – 8.44 (m, 1H), 8.38 – 8.35 (m, 1H), 7.84 – 7.80 (m, 1H), 7.63 – 7.53 (m, 1H), 7.51 – 7.39 (m, 4H), 2.47 – 2.29 (m, 1H), 2.00 – 1.90 (m, 1H), 1.73 (s, 3H), 1.01 – 0.81 (m, 2H), 0.74 (t, J = 7.0 Hz, 3H). <sup>13</sup>C NMR (75 MHz, CDCl<sub>3</sub>) δ 173.6, 150.4, 144.2, 142.0, 132.0, 131.4, 127.7, 126.2, 126.0, 125.9, 125.6, 123.1, 119.9, 115.8, 77.6, 77.2, 76.7, 49.6, 45.7, 28.8, 18.6, 14.1.

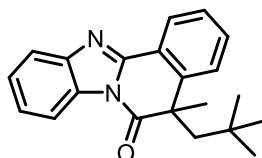

**5-methyl-5-neopentylbenzo[4,5]imidazo[2,1-a]isoquinolin-6(5H)-one (23)**<sup>[3]</sup>, white solid (38.7 mg, 41%). <sup>1</sup>H NMR (600 MHz, CDCl<sub>3</sub>) δ 8.49 (d, J = 7.7 Hz, 1H), 8.39 (d, J = 8.3 Hz, 1H), 7.83 (d, J = 7.4 Hz, 1H), 7.53 (t, J = 8.5 Hz, 2H), 7.49 – 7.41 (m, 3H), 2.64 (d, J = 14.5 Hz, 1H), 2.17 (d, J = 14.5 Hz, 1H), 1.71 (s, 3H), 0.54 (s, 9H). <sup>13</sup>C NMR (150 MHz, CDCl<sub>3</sub>) δ 173.5, 149.8, 144.1, 142.0, 131.5, 131.2, 127.64, 127.57, 125.9, 125.5, 122.4, 119.7, 115.8, 77.2, 77.0, 76.8, 55.3, 47.7, 33.1, 32.0, 30.8.

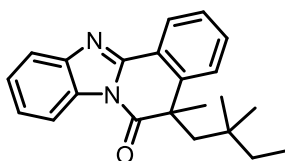

**5-(2,2-dimethylbutyl)-5-methylbenzo[4,5]imidazo[2,1-a]isoquinolin-6(5H)-one (24)**<sup>[3]</sup>, white solid (72.7 mg, 73%). <sup>1</sup>H NMR (600 MHz, CDCl<sub>3</sub>) δ 8.49 (d, J = 7.7 Hz, 1H), 8.39 (d, J = 7.7 Hz, 1H), 7.83 (d, J = 7.7 Hz, 1H), 7.53 (d, J = 6.4 Hz, 2H), 7.48 – 7.41 (m, 3H), 2.61 (d, J = 14.5 Hz, 1H), 2.16 (d, J = 14.5 Hz, 1H), 1.71 (s, 3H), 1.01 – 0.95 (m, 1H), 0.93 – 0.87 (m, 1H), 0.68 (t, J = 7.4 Hz, 3H), 0.48 (s, 3H), 0.36 (s, 3H). <sup>13</sup>C NMR (150 MHz, CDCl<sub>3</sub>) δ 173.5, 149.8, 144.1, 142.2, 131.5, 131.1, 127.6, 127.5, 125.89, 125.86, 125.5, 122.4, 119.7, 115.8, 77.2, 77.0, 76.8, 53.2, 47.5, 36.6, 34.5, 33.2, 27.6, 26.

9, 8.3.

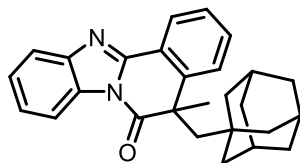

**5-(((3r,5r,7r)-adamantan-1-yl)methyl)-5-methylbenzo[4,5]imidazo[2,1-a]isoquinolin-6(5H)-one (25)**<sup>[3]</sup>, white solid (99.8 mg, 84%). <sup>1</sup>H NMR (600 MHz, CDCl<sub>3</sub>) δ 8.49 (d, J = 7.7 Hz, 1H), 8.40 (d, J = 8.4 Hz, 1H), 7.84 (d, J = 8.2 Hz, 1H), 7.52 (s, 2H), 7.50 – 7.42 (m, 3H), 2.51 (d, J = 14.6 Hz, 1H), 2.07 (d, J = 14.6 Hz, 1H), 1.67 (s, 3H), 1.63 (s, 3H), 1.43 (d, J = 12.0 Hz, 3H), 1.30 (d, J = 11.6 Hz, 3H), 1.16 – 1.08 (m, 6H). <sup>13</sup>C NMR (150 MHz, CDCl<sub>3</sub>) δ 173.5, 149.8, 144.1, 142.3, 131.5, 131.1, 127.6, 125.9, 125.5, 122.1, 119.7, 115.9, 77.2, 77.0, 76.8, 56.2, 46.9, 43.5, 36.5, 34.2, 33.7, 28.4.

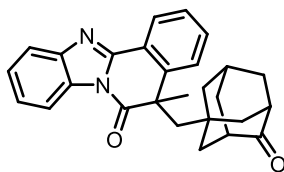

**5-methyl-5-(((1s,3R,5S,7s)-4-oxoadamantan-1-yl)methyl)benzo[4,5]imidazo[2,1-a]isoquinolin-6(5H)-one (26)**<sup>[3]</sup>, white solid (61.5 mg, 50%). <sup>1</sup>H NMR (300 MHz, CDCl<sub>3</sub>) δ 8.50 (d, J = 7.0 Hz, 1H), 8.38 (d, J = 6.7 Hz, 1H), 7.84 (d, J = 6.7 Hz, 1H), 7.56 – 7.45 (m, 5H), 2.64 (d, J = 14.6 Hz, 1H), 2.24 (d, J = 16.5 Hz, 2H), 2.15 – 2.11 (m, 1H), 1.80 (s, 1H), 1.68 (s, 6H), 1.62 – 1.53 (m, 2H), 1.52 – 1.38 (m, 3H), 1.33 – 1.25 (m, 2H). <sup>13</sup>C NMR (75 MHz, CDCl<sub>3</sub>) δ 217.6, 173.2, 141.6, 131.5, 128.1, 127.4, 126.30, 126.25, 125.9, 122.2, 120.0, 116.0, 77.6, 77.2, 76.7, 53.7, 47.0, 46.4, 46.2, 45.1, 44.4, 41.8, 38.34, 38.31, 34.2, 33.9, 27.7.

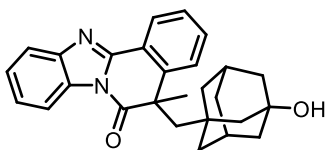

**5-(((1s,3s,5R,7S)-3-hydroxyadamantan-1-yl)methyl)-5-methylbenzo[4,5]imidazo[2,1-a]isoquinolin-6(5H)-one (27)**<sup>[3]</sup>, white solid (68.1 mg, 55%). <sup>1</sup>H NMR (300 MHz, CDCl<sub>3</sub>) δ 8.53

– 8.46 (m, 1H), 8.43 – 8.34 (m, 1H), 7.88 – 7.80 (m, 1H), 7.57 – 7.41 (m, 5H), 2.60 (d,  $J = 14.6$  Hz, 1H), 2.14 (d,  $J = 14.6$  Hz, 1H), 1.89 – 1.84 (m, 2H), 1.67 (s, 3H), 1.43 – 1.26 (m, 5H), 1.16 – 0.93 (m, 7H).  $^{13}\text{C}$  NMR (75 MHz,  $\text{CDCl}_3$ )  $\delta$  173.4, 149.8, 144.1, 142.1, 131.5, 131.4, 127.9, 127.6, 126.1, 126.0, 125.8, 122.1, 119.9, 116.0, 77.6, 77.2, 76.7, 68.6, 55.0, 51.7, 47.0, 44.6, 44.1, 41.7, 41.0, 37.8, 35.0, 33.9, 30.7, 30.5.

## 7. Spectra of prepared compounds

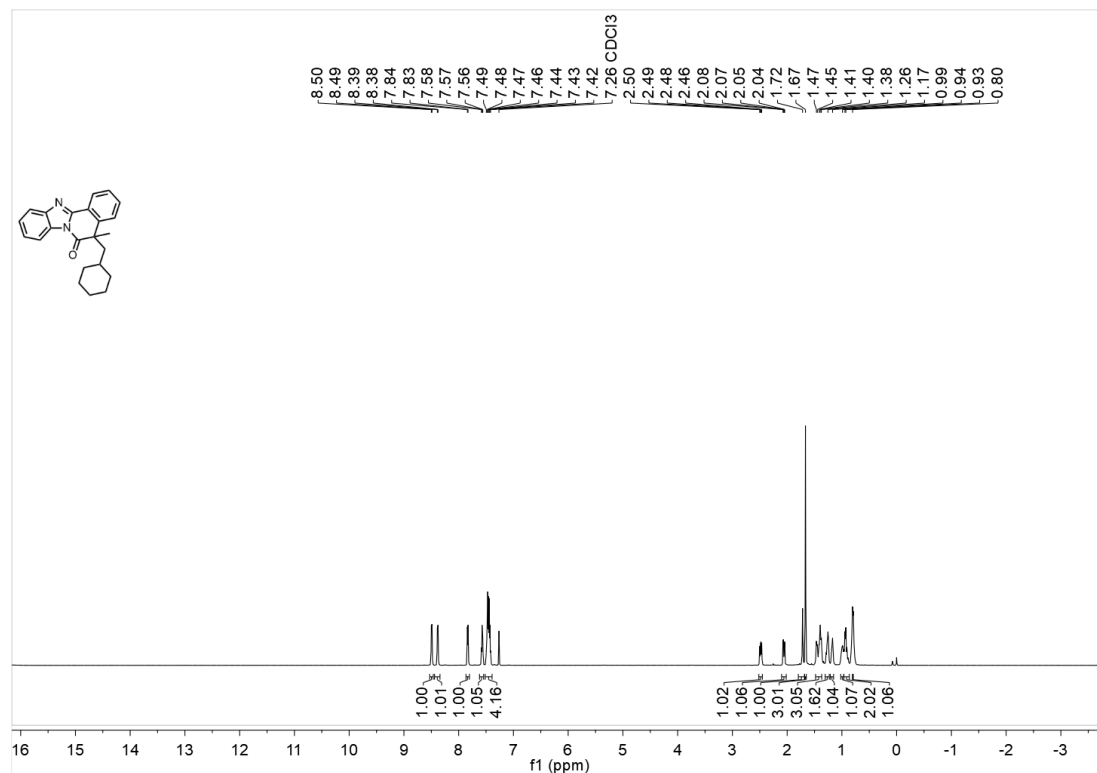

<sup>1</sup>H NMR (600 MHz, CDCl<sub>3</sub>) spectrum of **3**

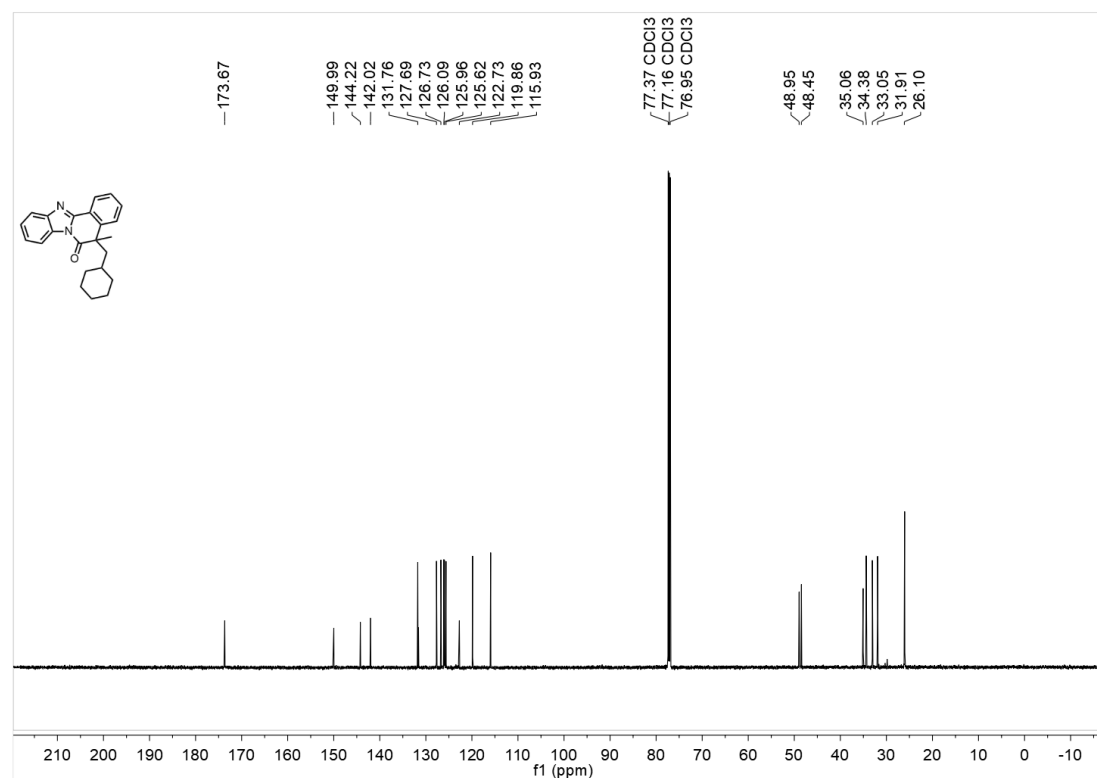

<sup>13</sup>C NMR (150 MHz, CDCl<sub>3</sub>) spectrum of **3**



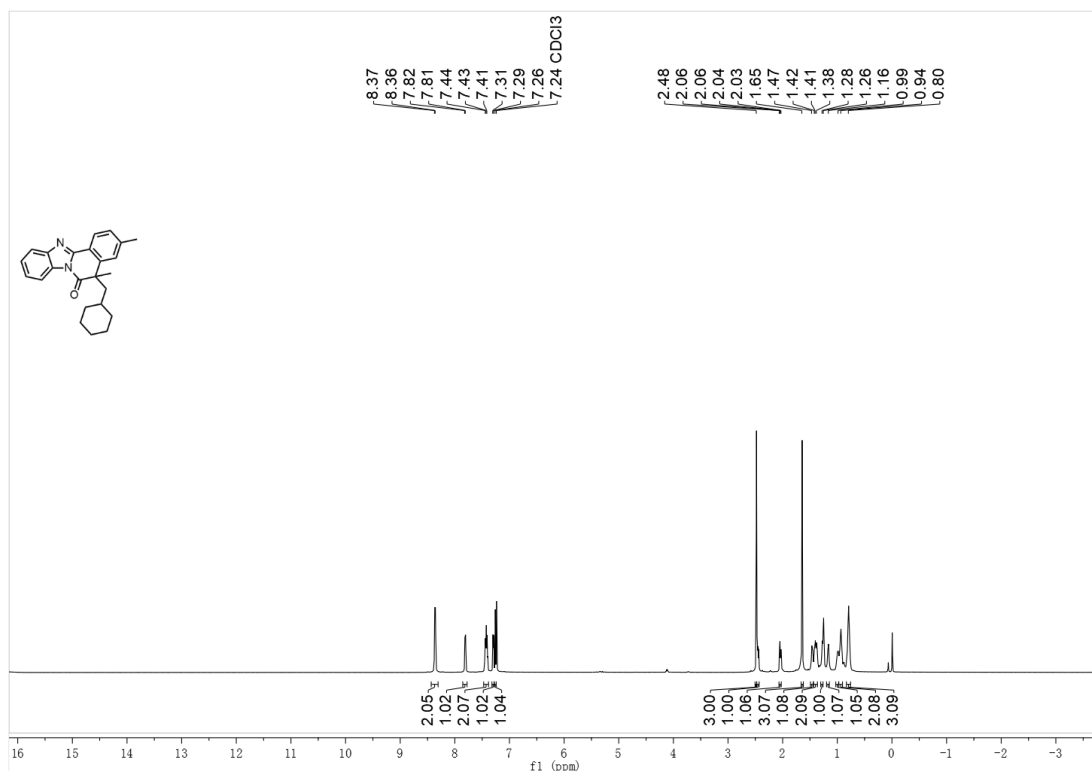

<sup>1</sup>H NMR (600 MHz, CDCl<sub>3</sub>) spectrum of **4**

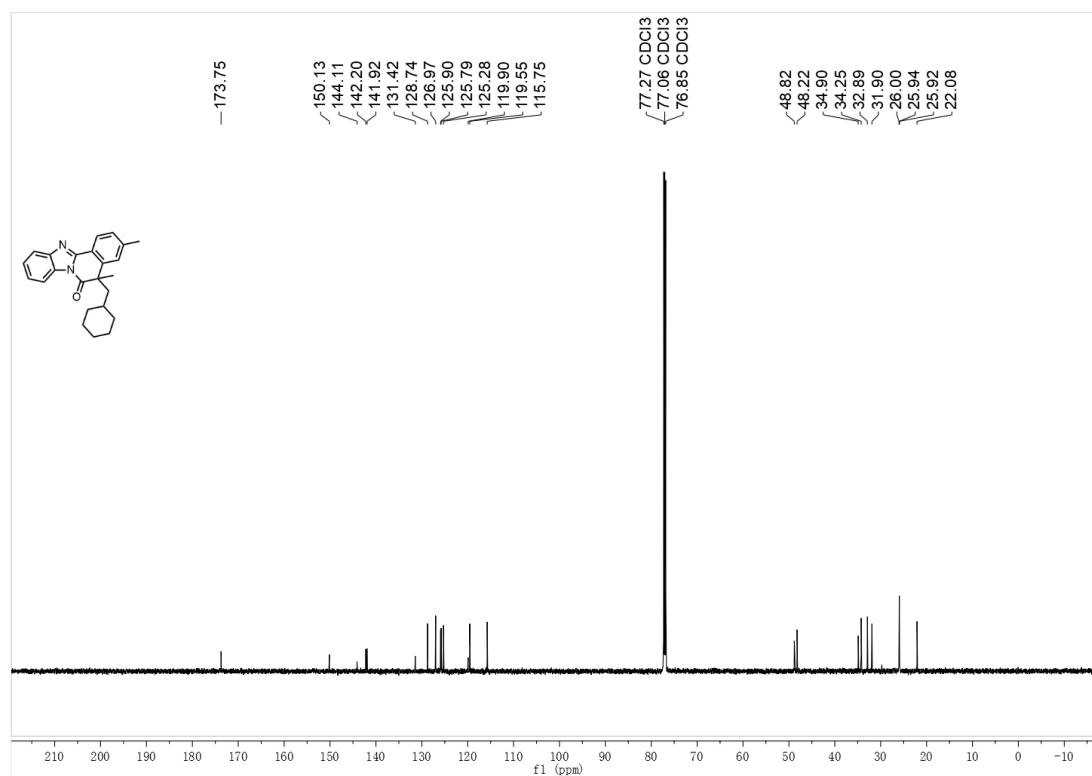

<sup>13</sup>C NMR (150 MHz, CDCl<sub>3</sub>) spectrum of **4**



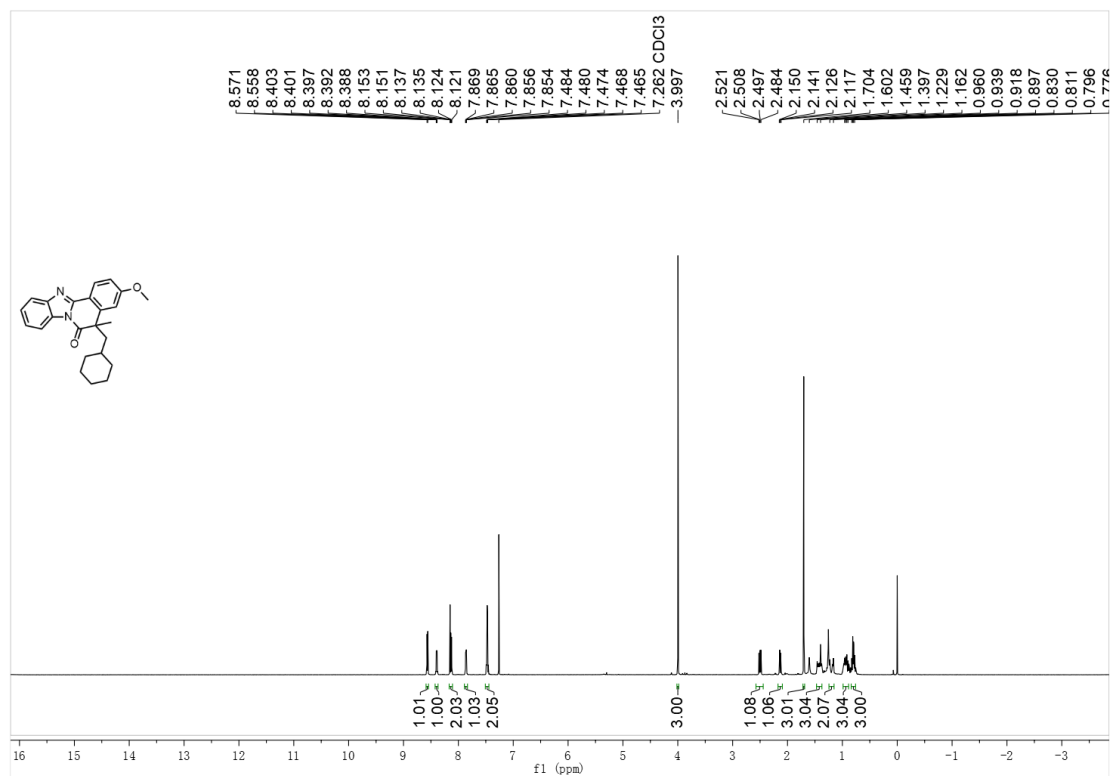

<sup>1</sup>H NMR (600 MHz, CDCl<sub>3</sub>) spectrum of 6

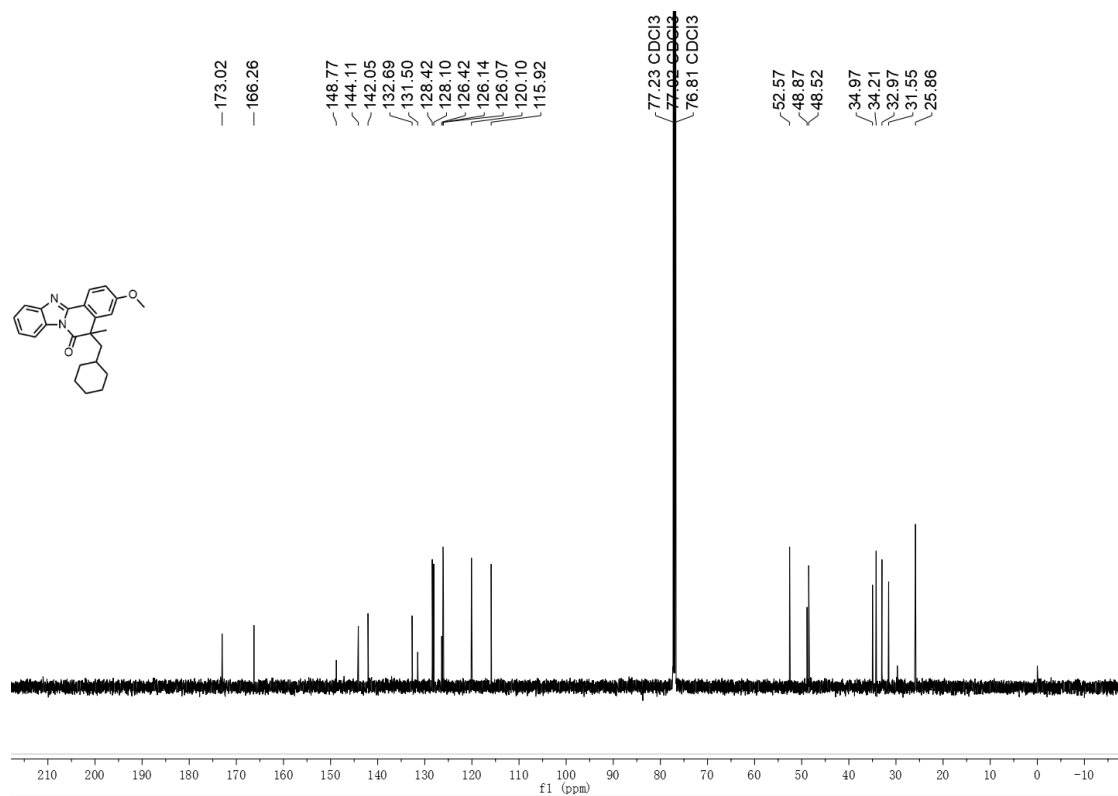

<sup>13</sup>C NMR (150 MHz, CDCl<sub>3</sub>) spectrum of 6

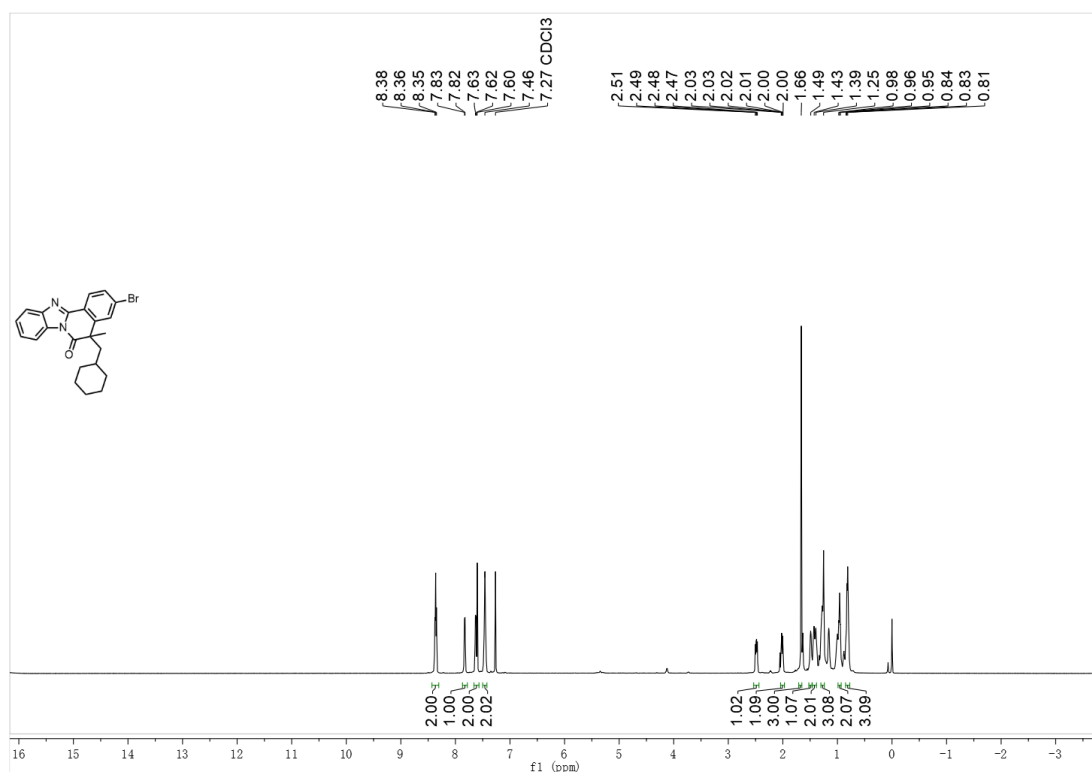

<sup>1</sup>H NMR (600 MHz, CDCl<sub>3</sub>) spectrum of 7

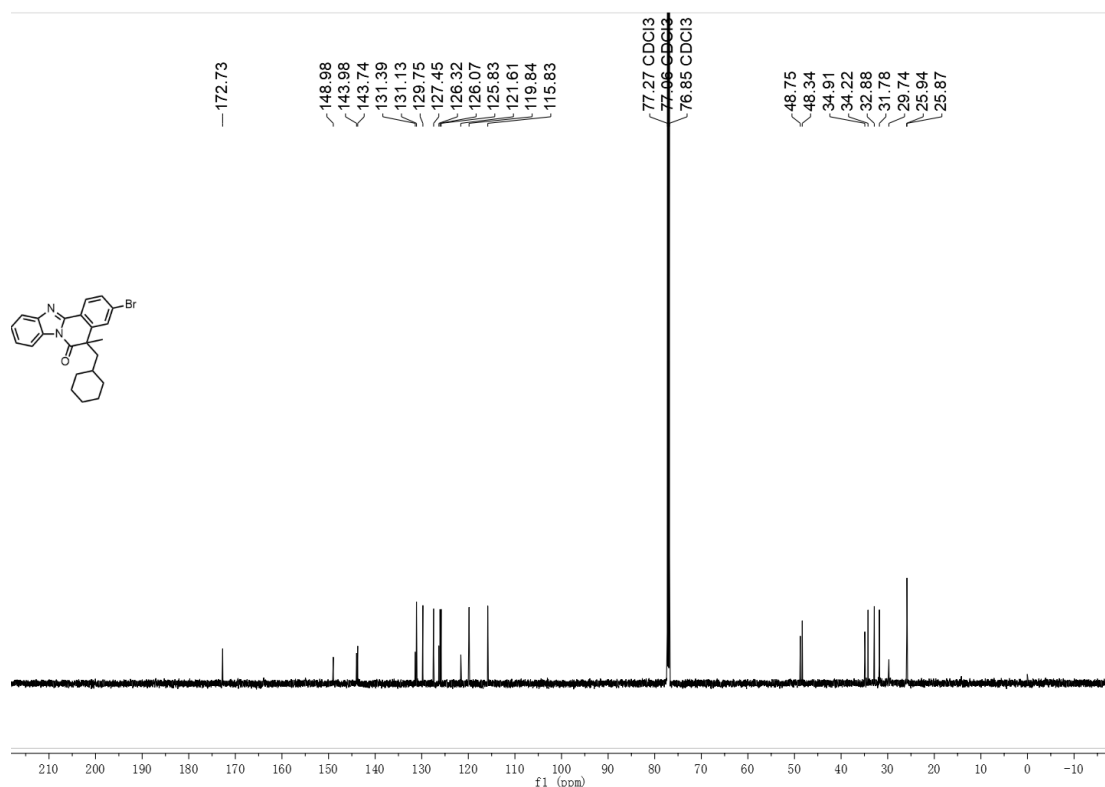

<sup>13</sup>C NMR (150 MHz, CDCl<sub>3</sub>) spectrum of 7

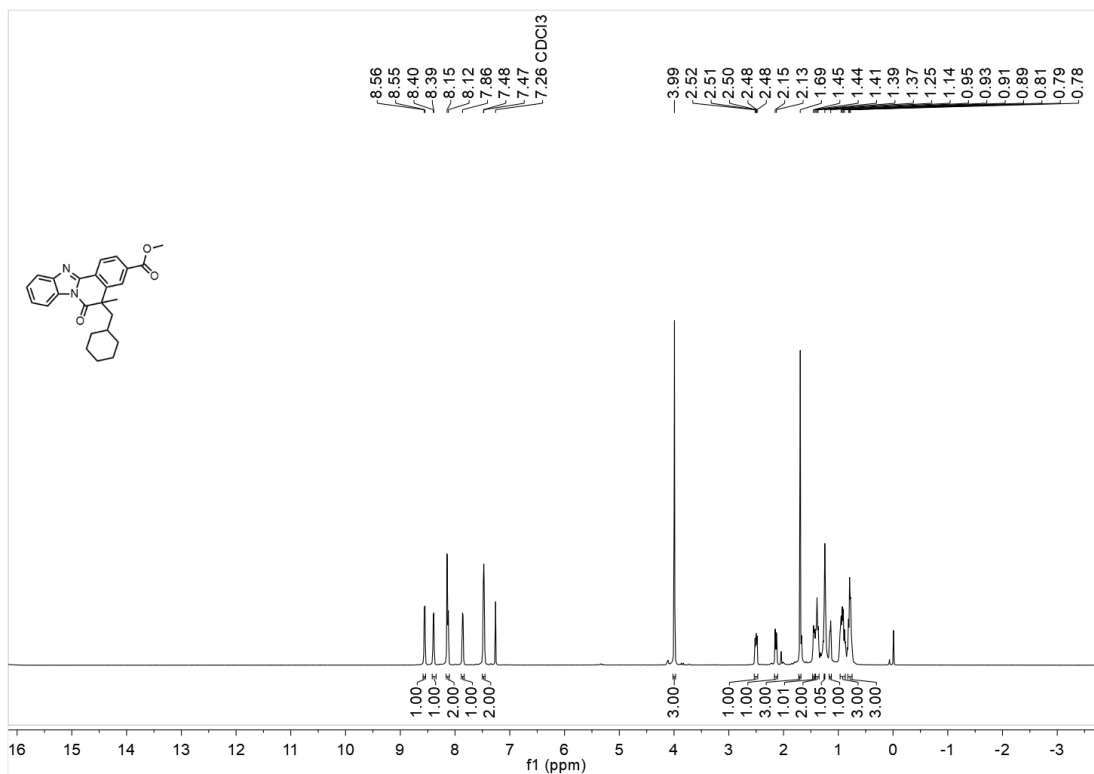

<sup>1</sup>H NMR (600 MHz, CDCl<sub>3</sub>) spectrum of **8**

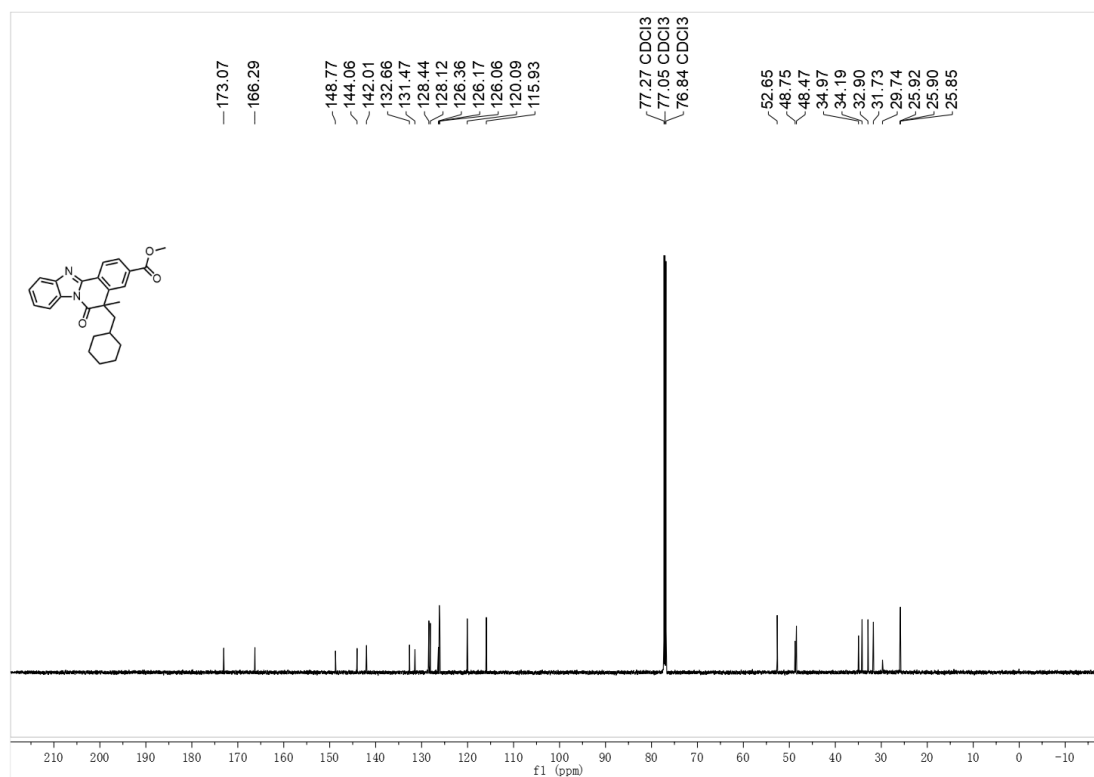

<sup>13</sup>C NMR (150 MHz, CDCl<sub>3</sub>) spectrum of **8**

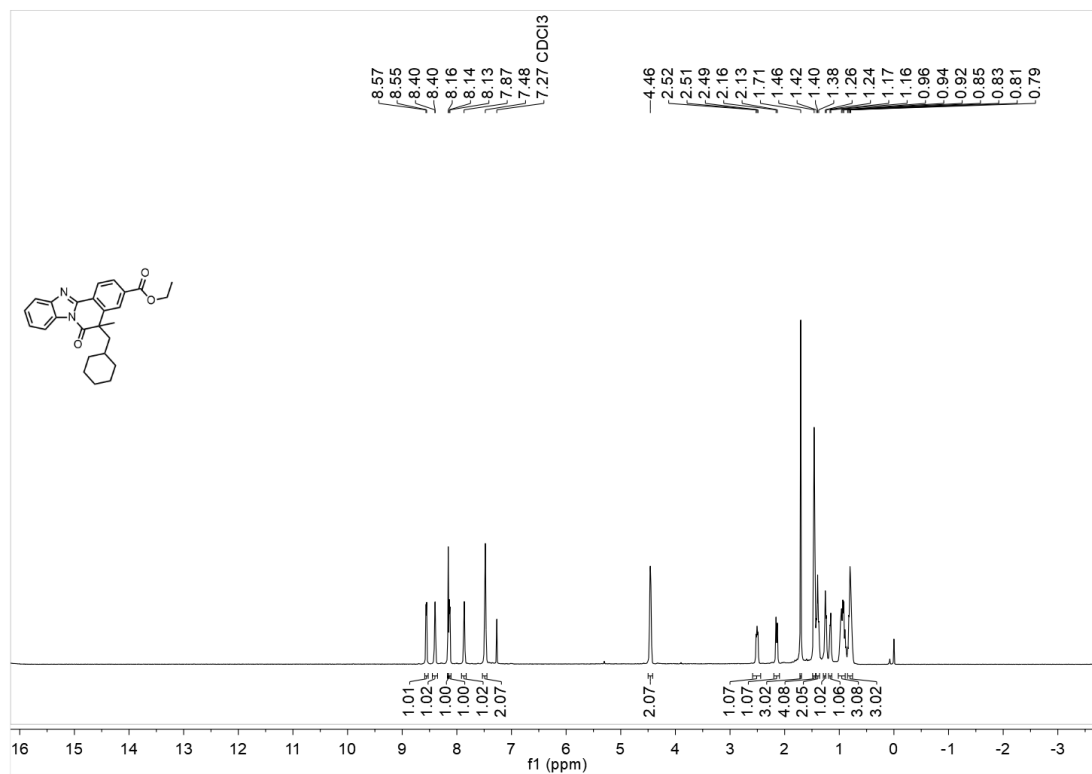

$^1\text{H}$  NMR (600 MHz,  $\text{CDCl}_3$ ) spectrum of **9**

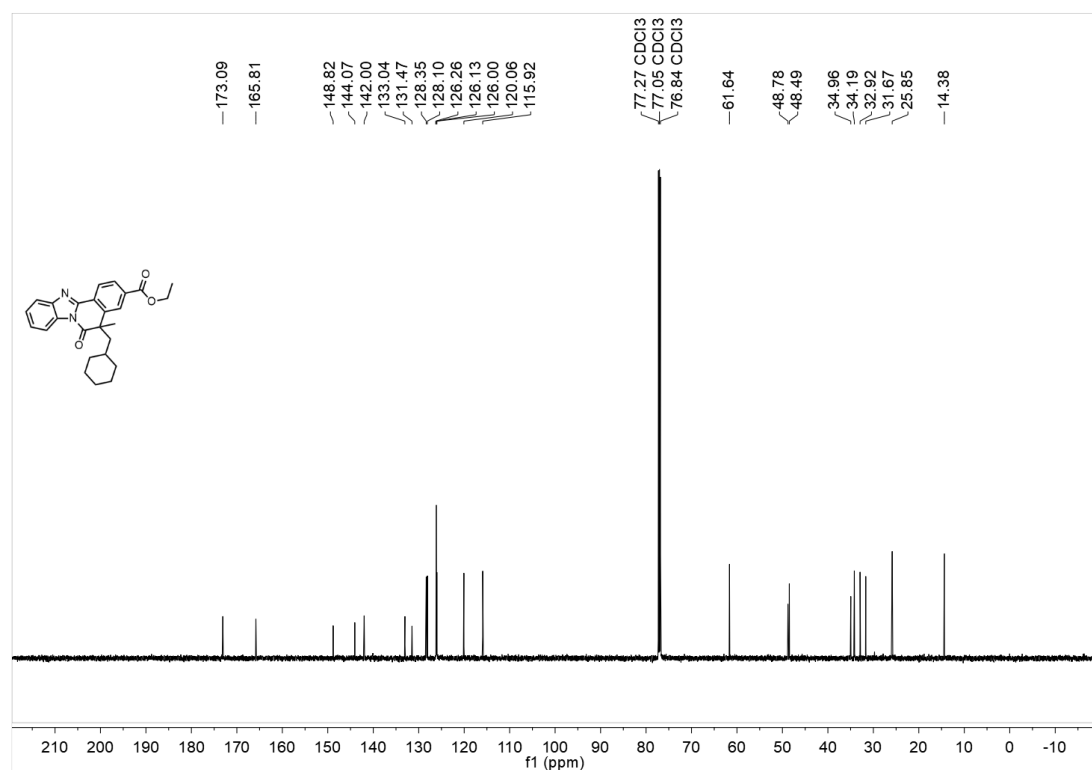

$^{13}\text{C}$  NMR (150 MHz,  $\text{CDCl}_3$ ) spectrum of **9**

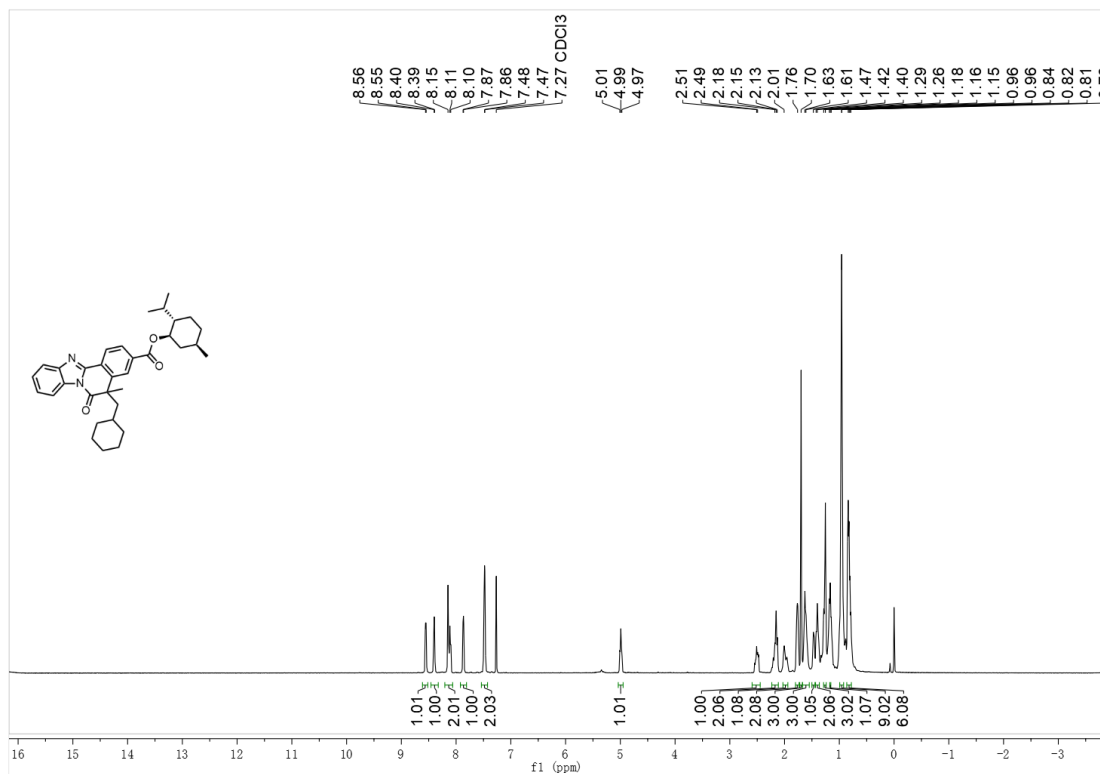

$^1\text{H}$  NMR (600 MHz,  $\text{CDCl}_3$ ) spectrum of **10**

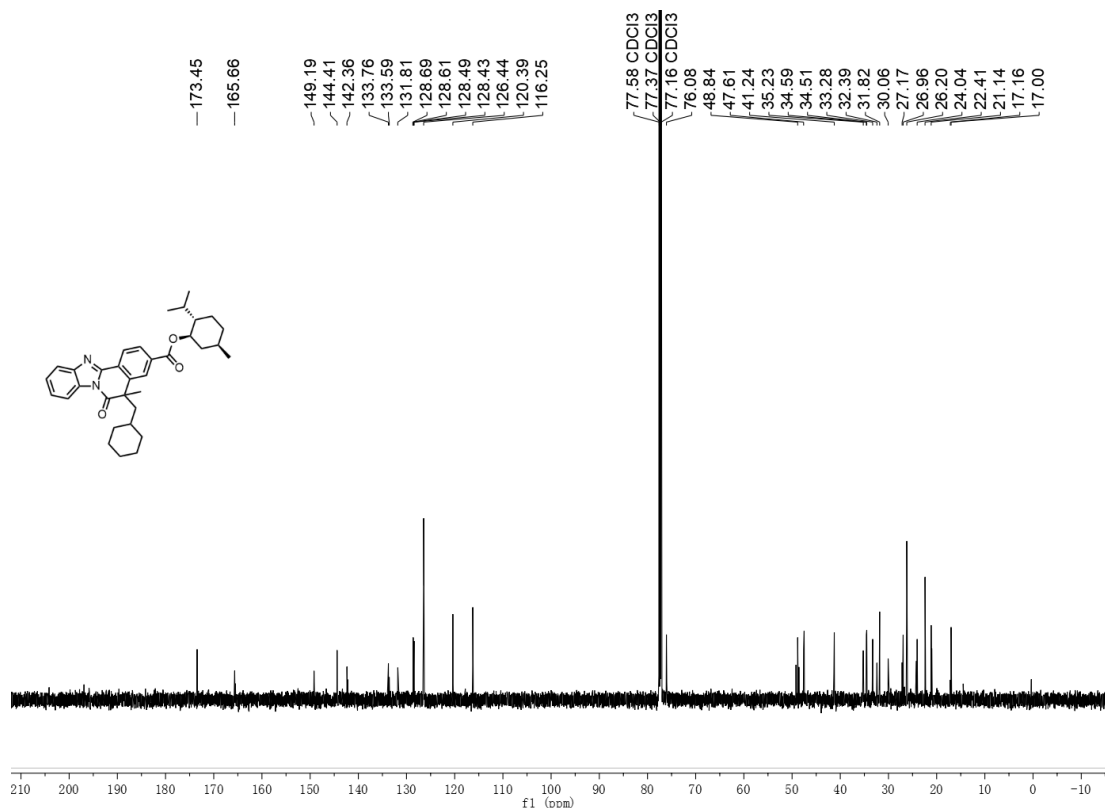

$^{13}\text{C}$  NMR (150 MHz,  $\text{CDCl}_3$ ) spectrum of **10**

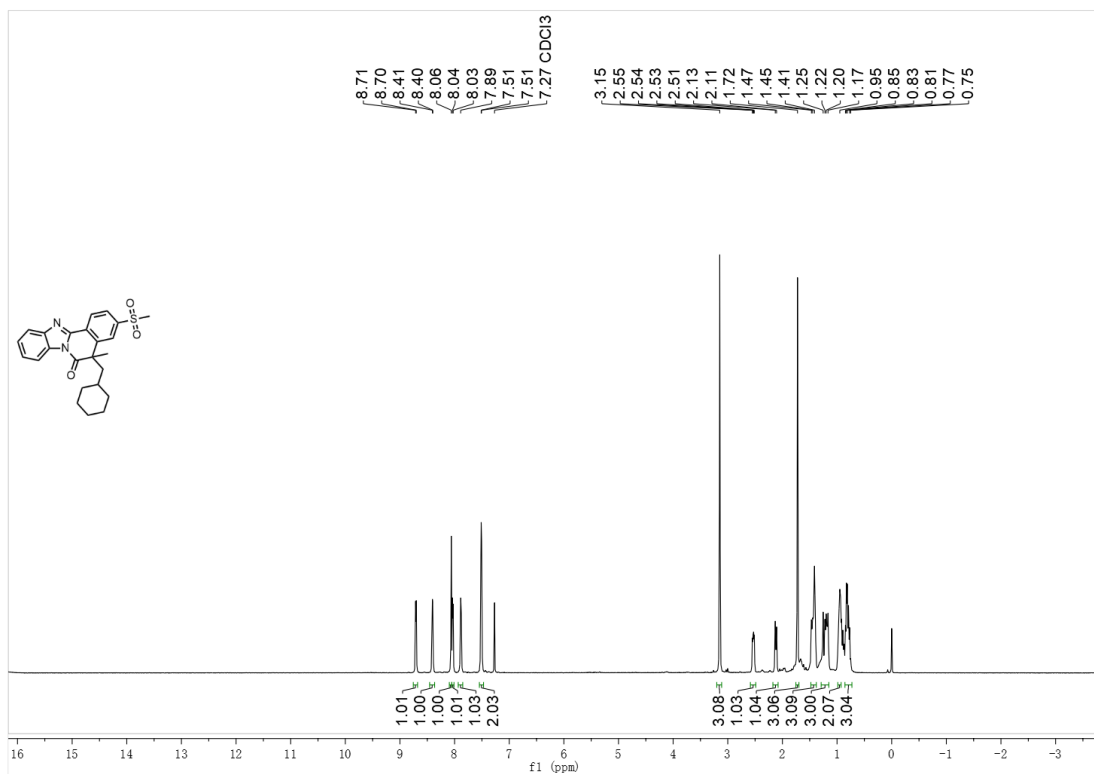

<sup>1</sup>H NMR (600 MHz, CDCl<sub>3</sub>) spectrum of **11**

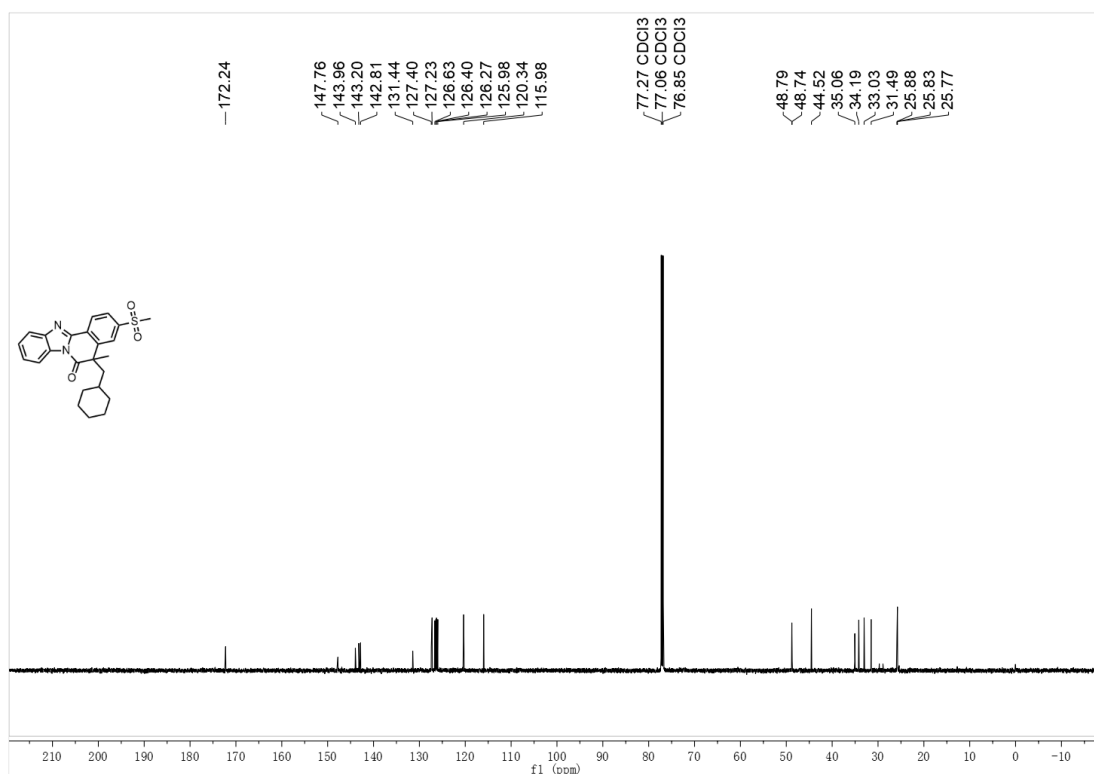

<sup>13</sup>C NMR (150 MHz, CDCl<sub>3</sub>) spectrum of **11**



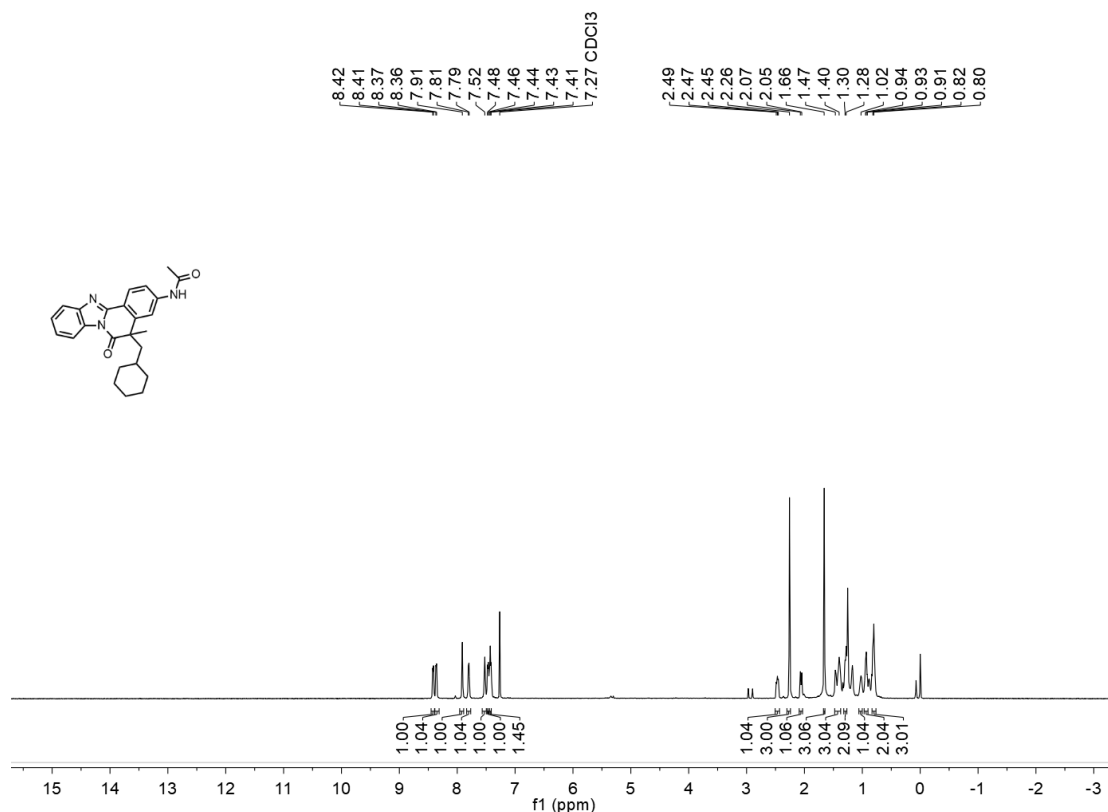

**<sup>1</sup>H NMR (600 MHz, CDCl<sub>3</sub>) spectrum of **12****

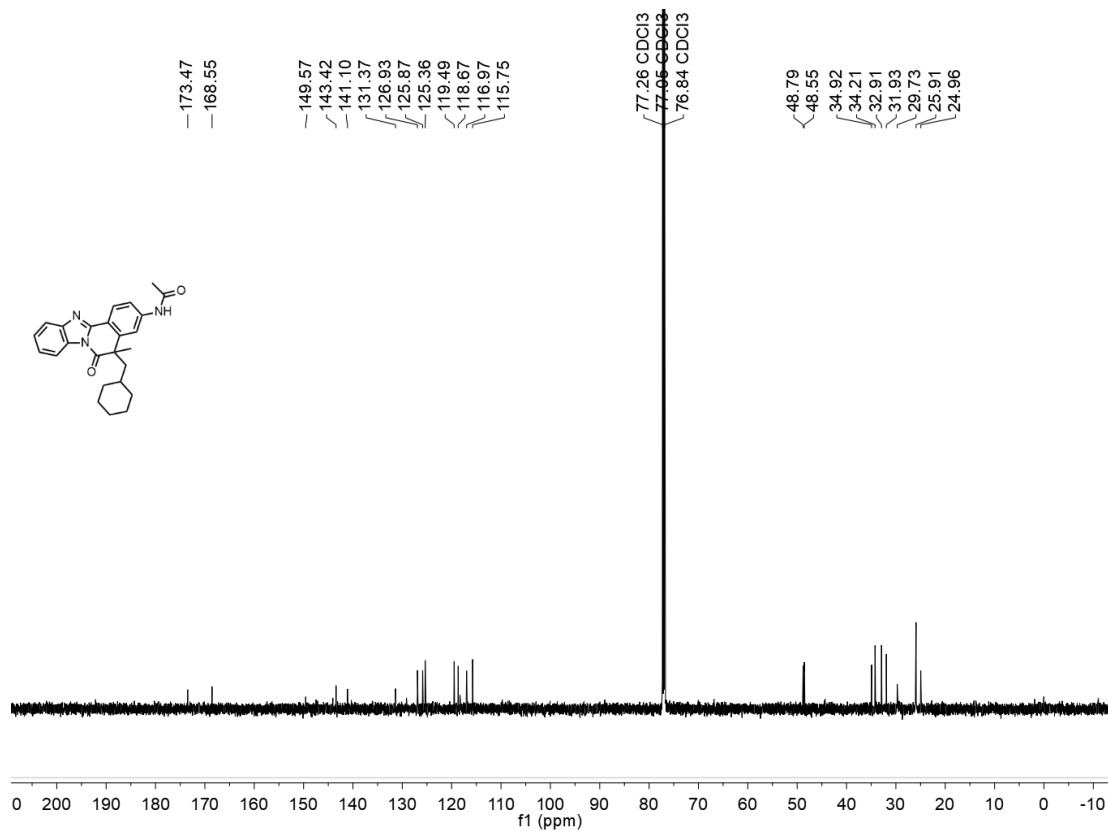

**<sup>13</sup>C NMR (150 MHz, CDCl<sub>3</sub>) spectrum of **12****

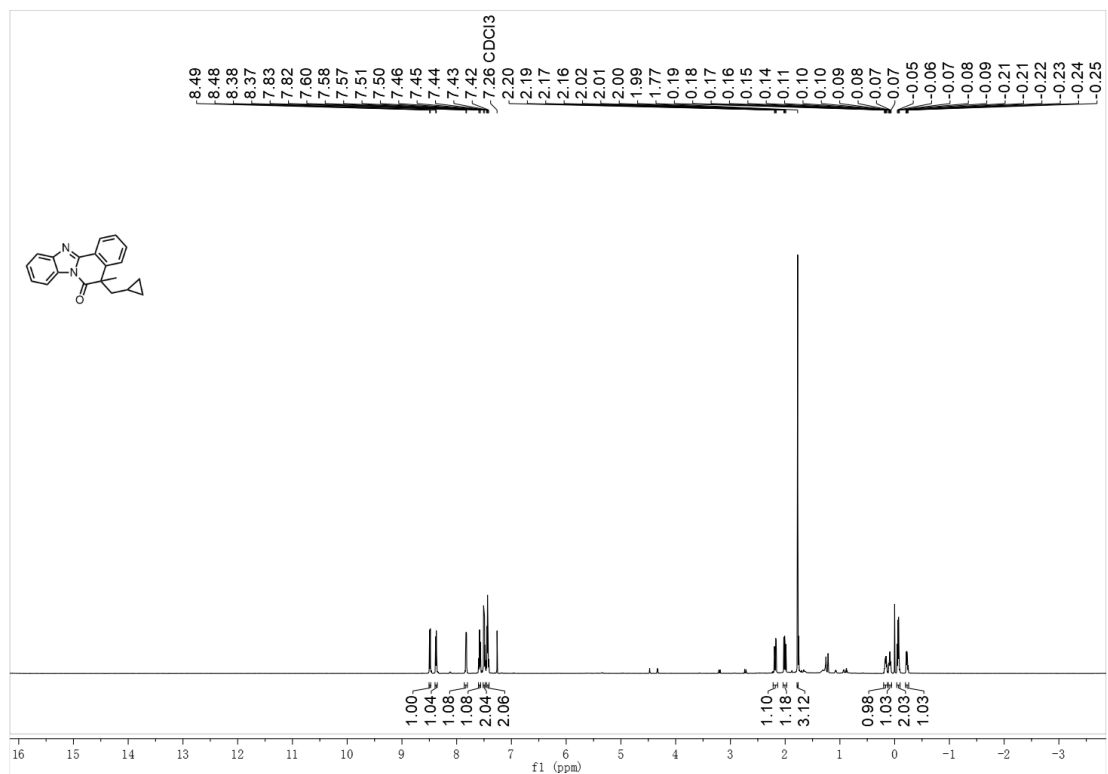

<sup>1</sup>H NMR (600 MHz, CDCl<sub>3</sub>) spectrum of 13

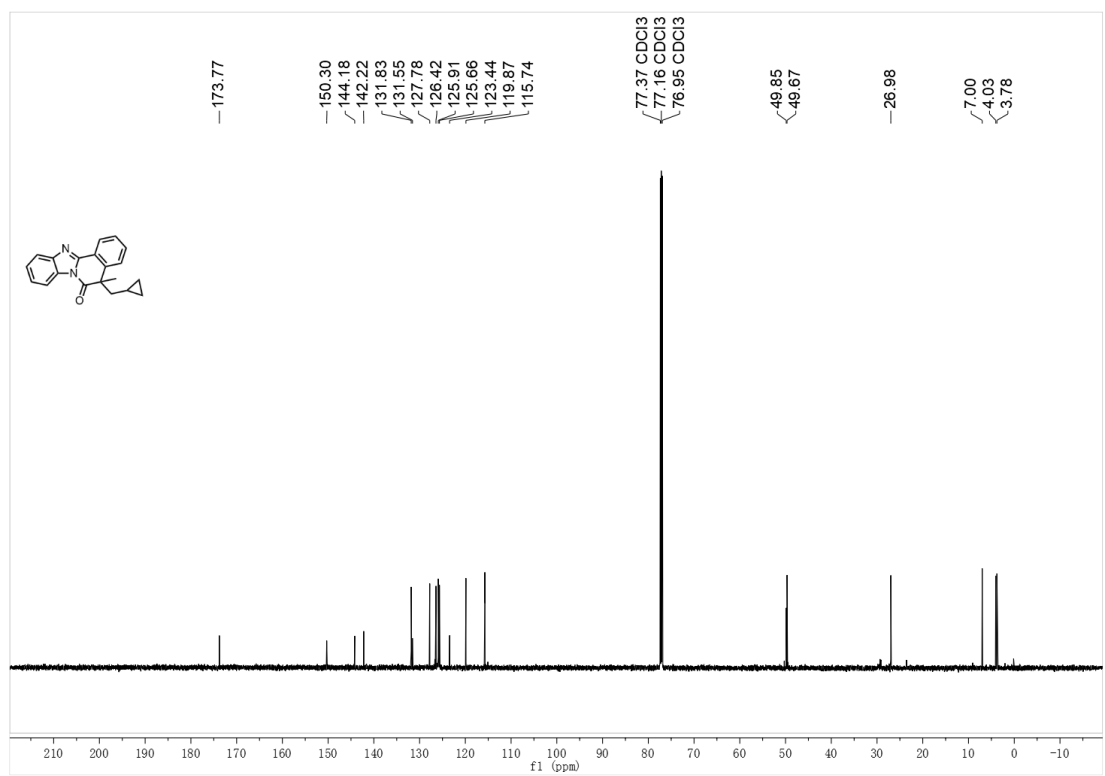

<sup>13</sup>C NMR (150 MHz, CDCl<sub>3</sub>) spectrum of 13

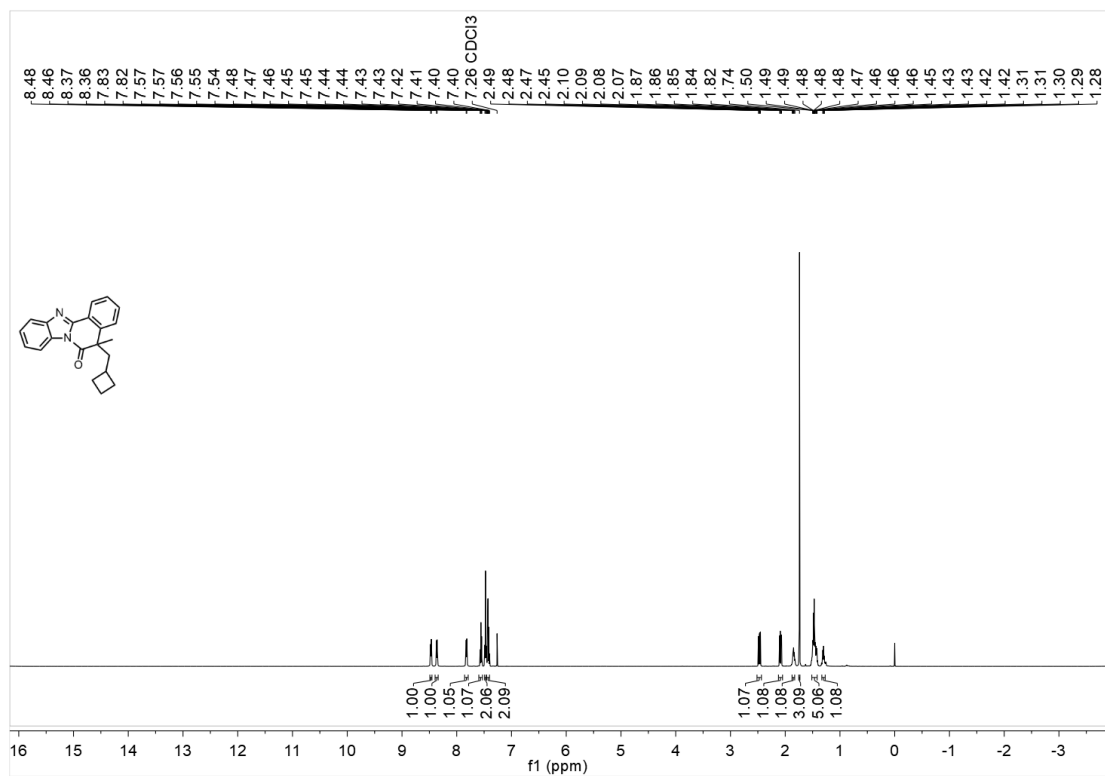

<sup>1</sup>H NMR (600 MHz, CDCl<sub>3</sub>) spectrum of 14

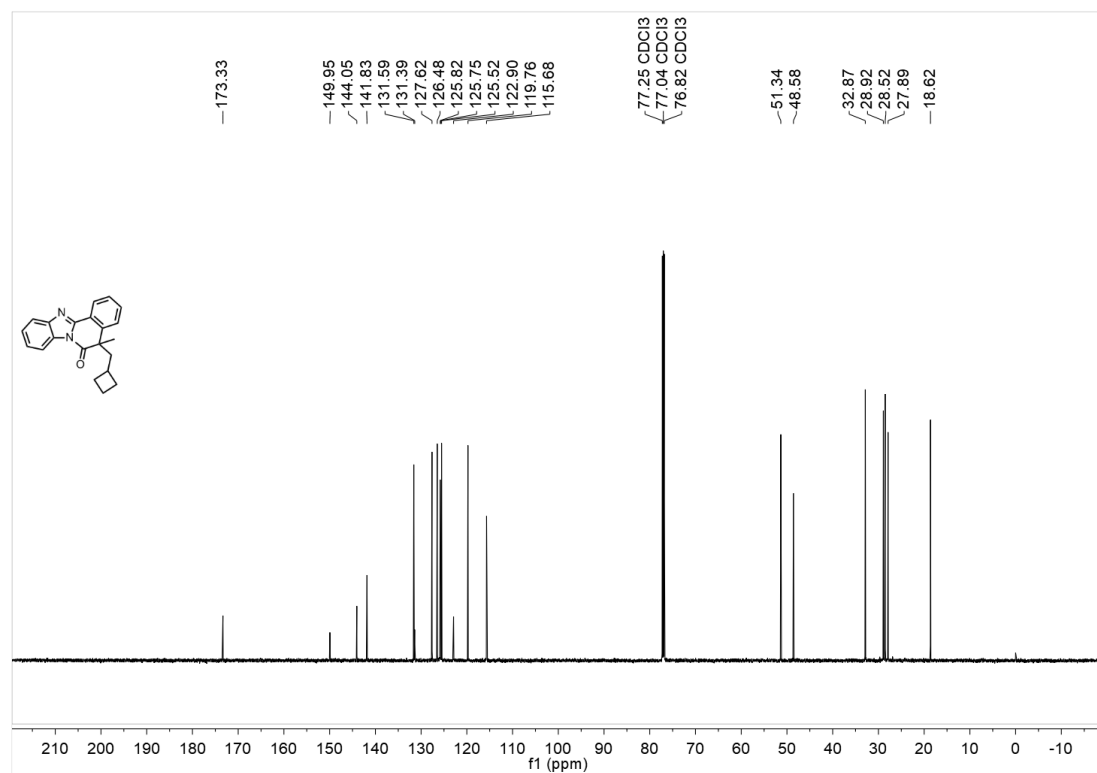

<sup>13</sup>C NMR (150 MHz, CDCl<sub>3</sub>) spectrum of 14

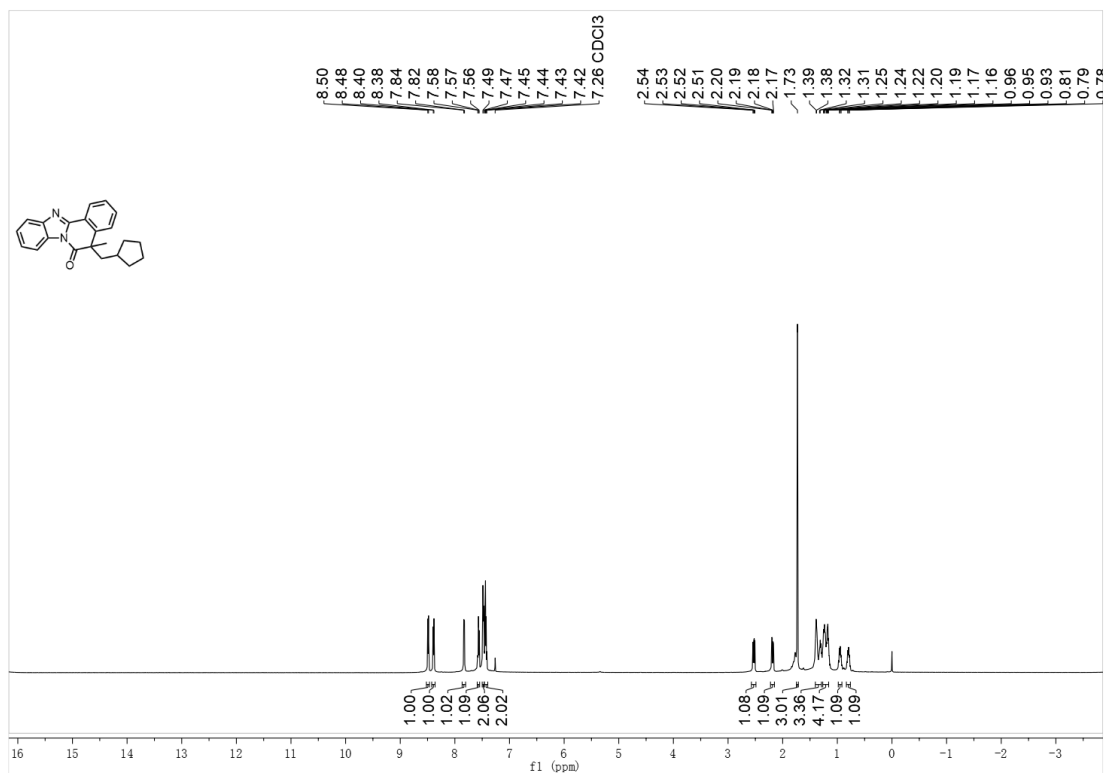

<sup>1</sup>H NMR (600 MHz, CDCl<sub>3</sub>) spectrum of **15**

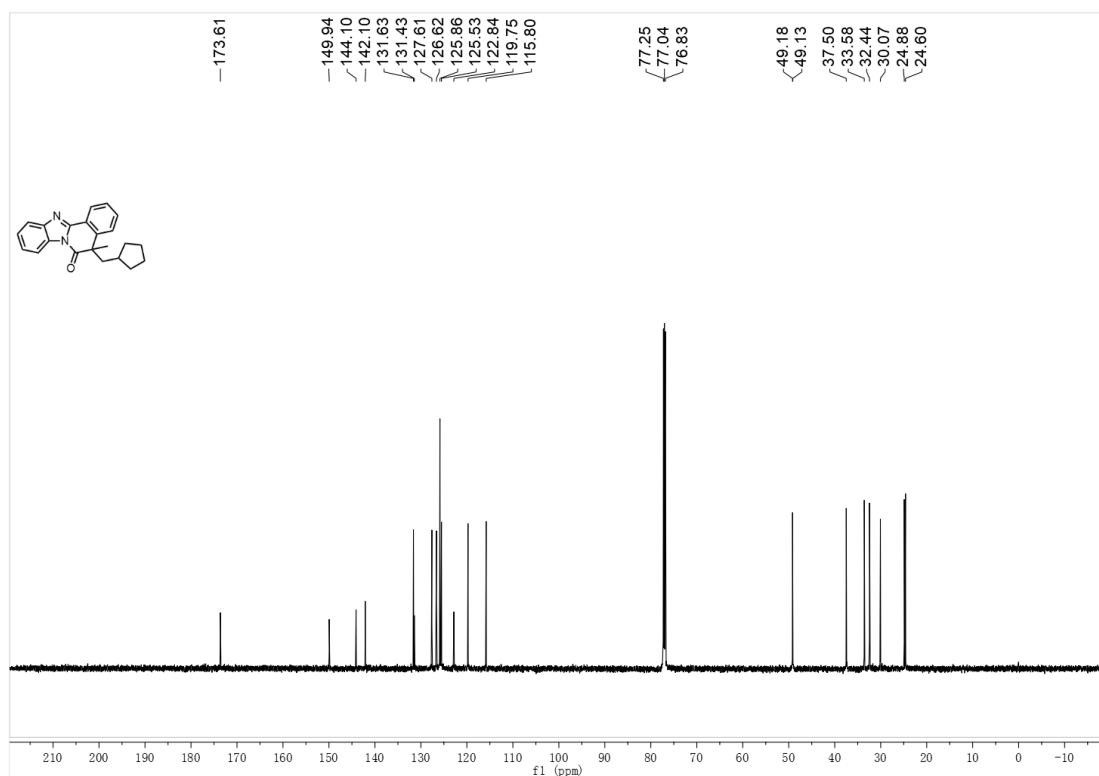

<sup>13</sup>C NMR (150 MHz, CDCl<sub>3</sub>) spectrum of **15**

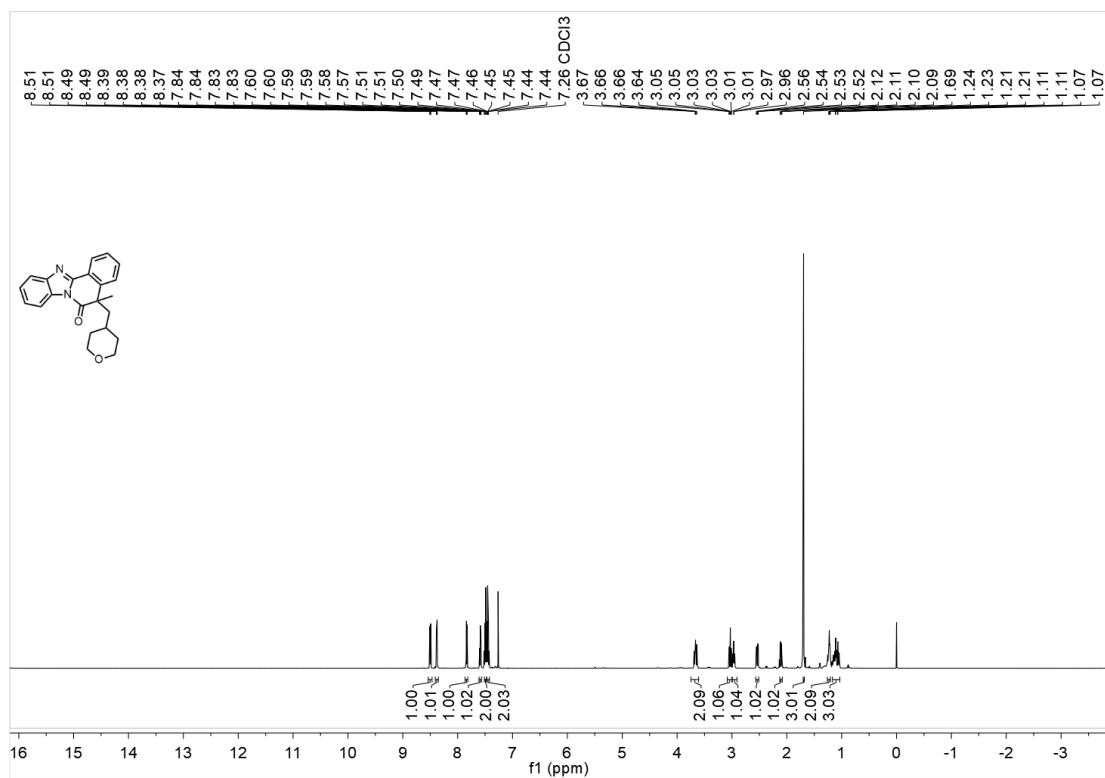

<sup>1</sup>H NMR (600 MHz, CDCl<sub>3</sub>) spectrum of 16

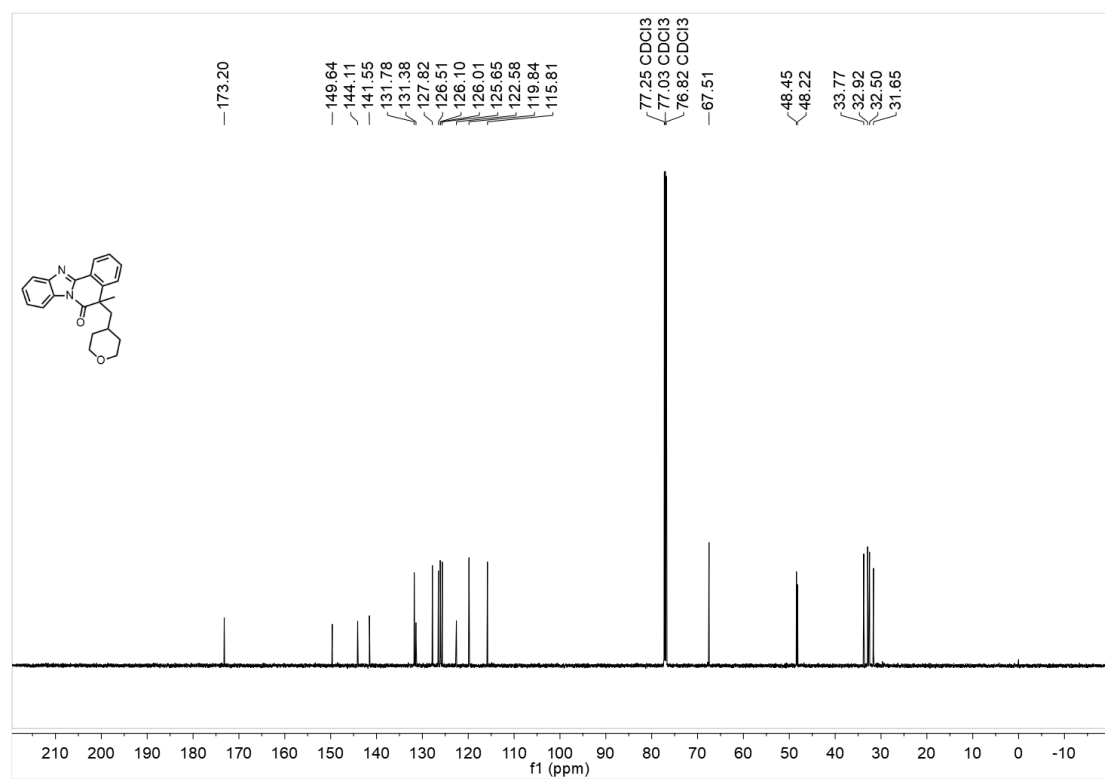

<sup>13</sup>C NMR (150 MHz, CDCl<sub>3</sub>) spectrum of 16

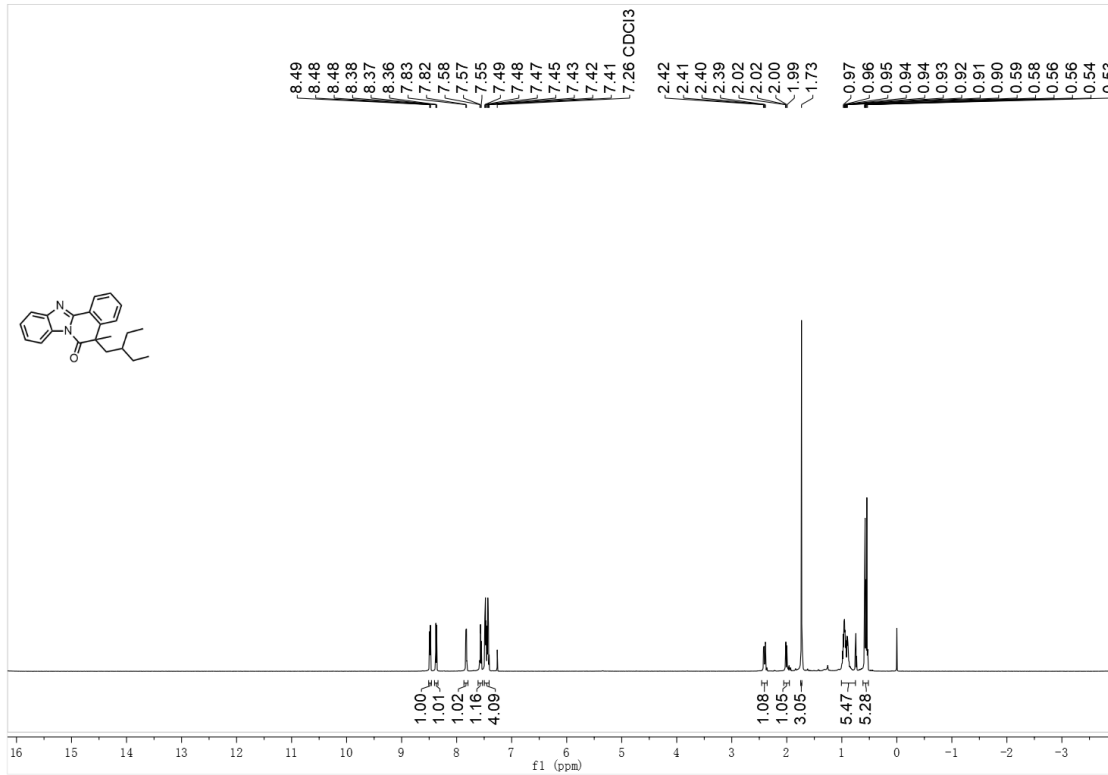

<sup>1</sup>H NMR (600 MHz, CDCl<sub>3</sub>) spectrum of **17**

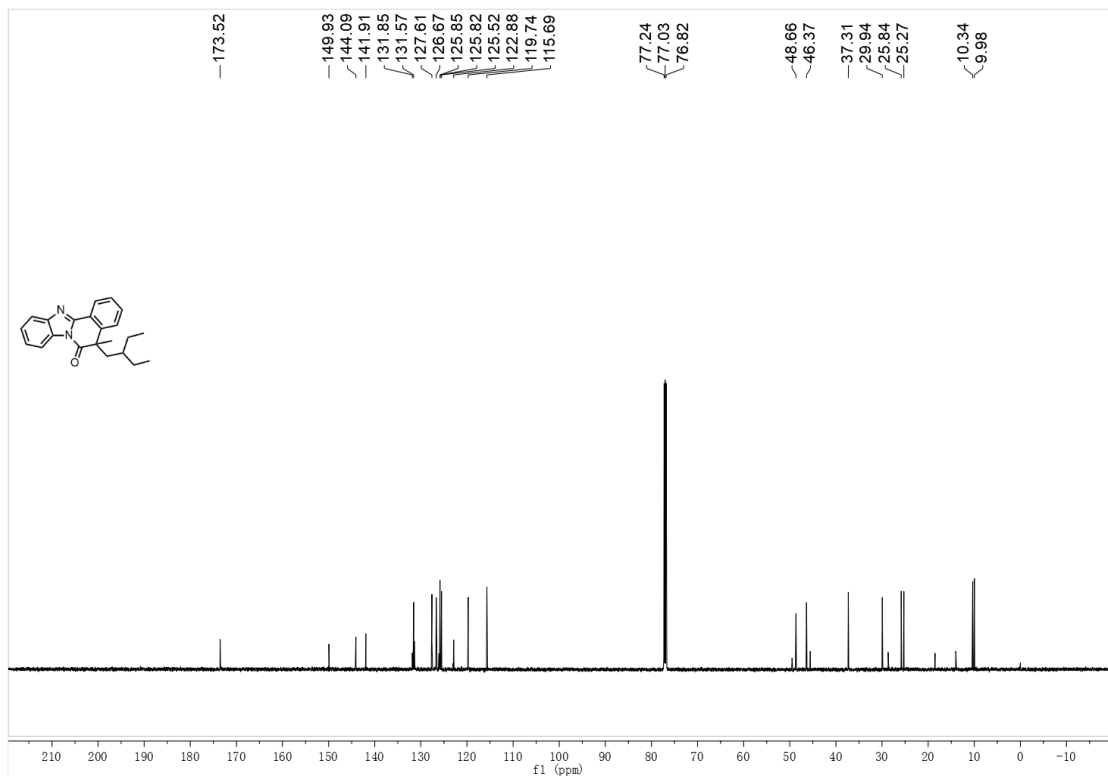

<sup>13</sup>C NMR (150 MHz, CDCl<sub>3</sub>) spectrum of **17**

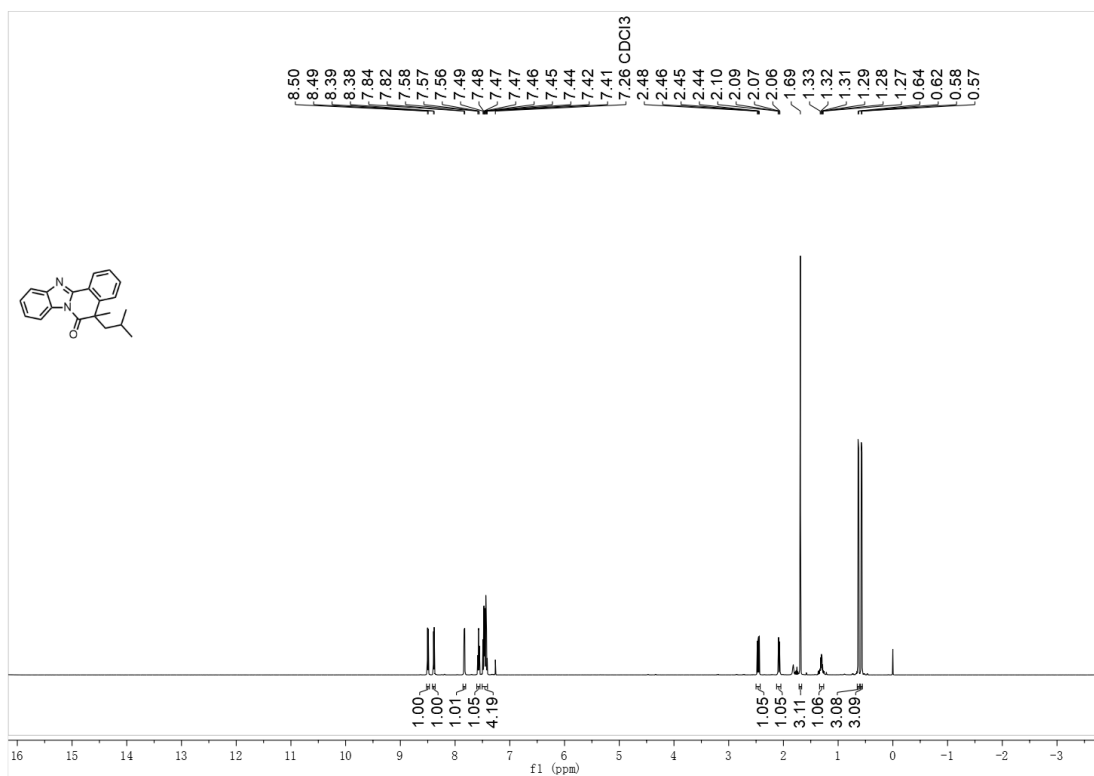

<sup>1</sup>H NMR (600 MHz, CDCl<sub>3</sub>) spectrum of **18**

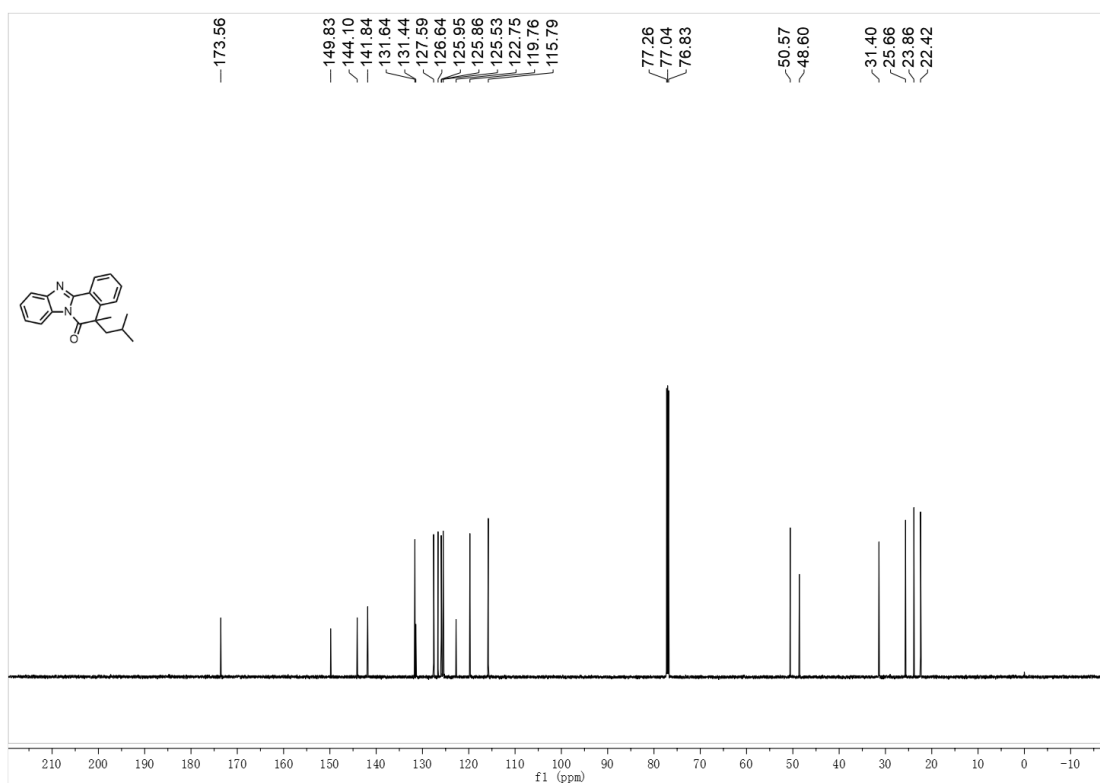

<sup>13</sup>C NMR (150 MHz, CDCl<sub>3</sub>) spectrum of **18**

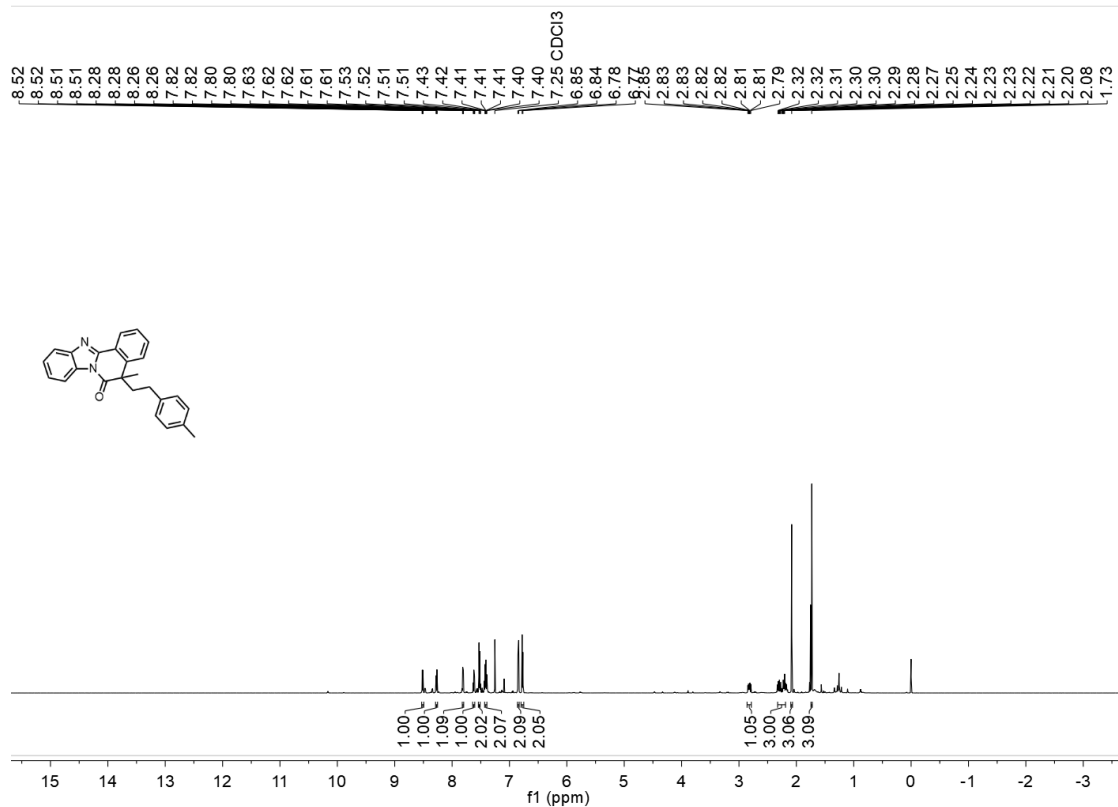

<sup>1</sup>H NMR (600 MHz, CDCl<sub>3</sub>) spectrum of 19

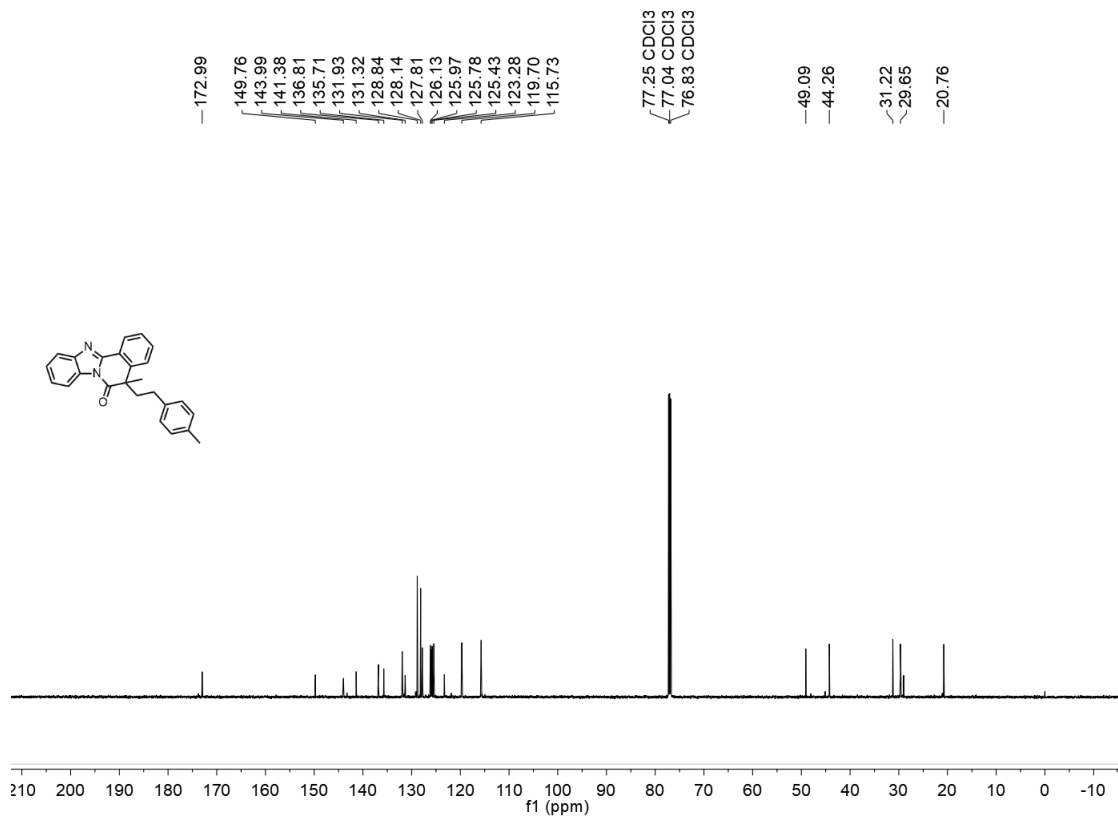

<sup>13</sup>C NMR (150 MHz, CDCl<sub>3</sub>) spectrum of 19



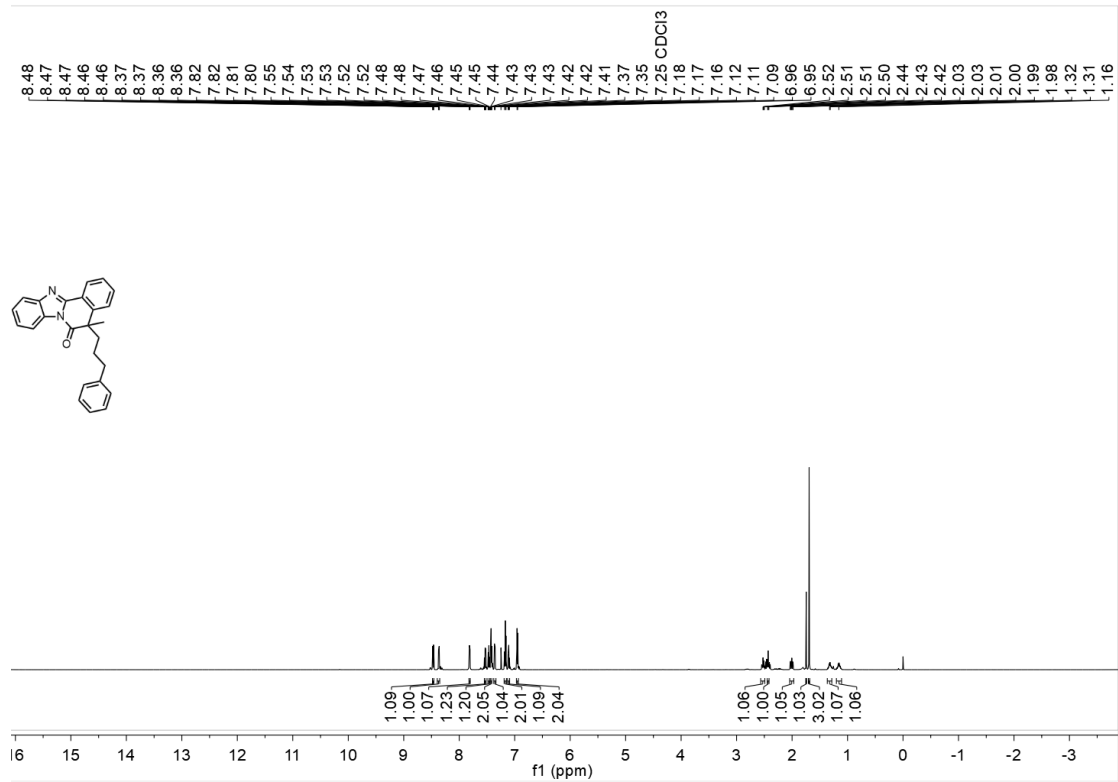

$^1\text{H NMR}$  (600 MHz,  $\text{CDCl}_3$ ) spectrum of **20**

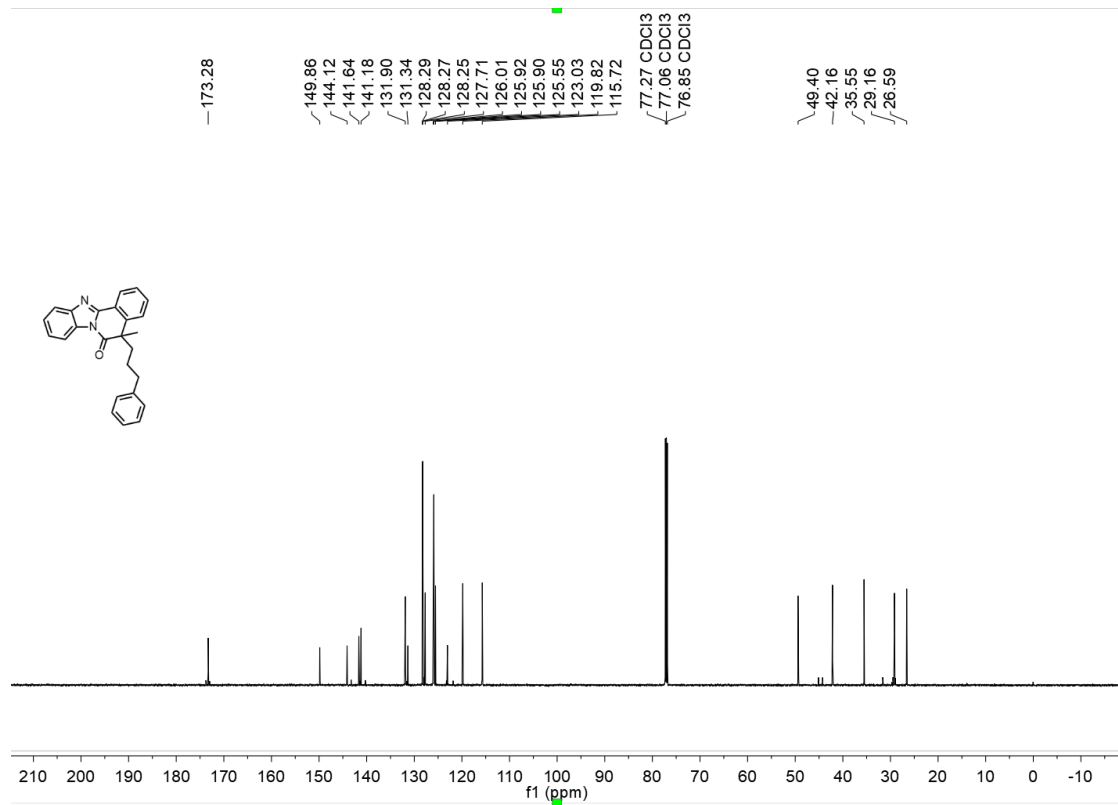

$^{13}\text{C NMR}$  (150 MHz,  $\text{CDCl}_3$ ) spectrum of **20**

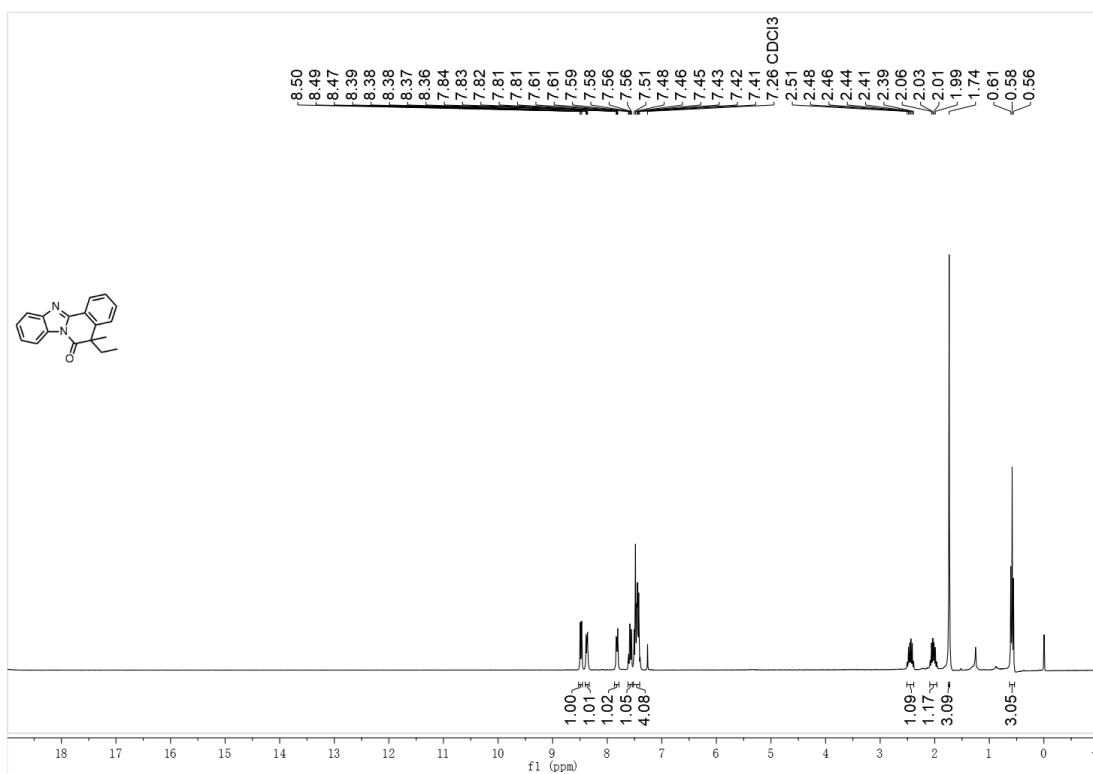

<sup>1</sup>H NMR (600 MHz, CDCl<sub>3</sub>) spectrum of **21**

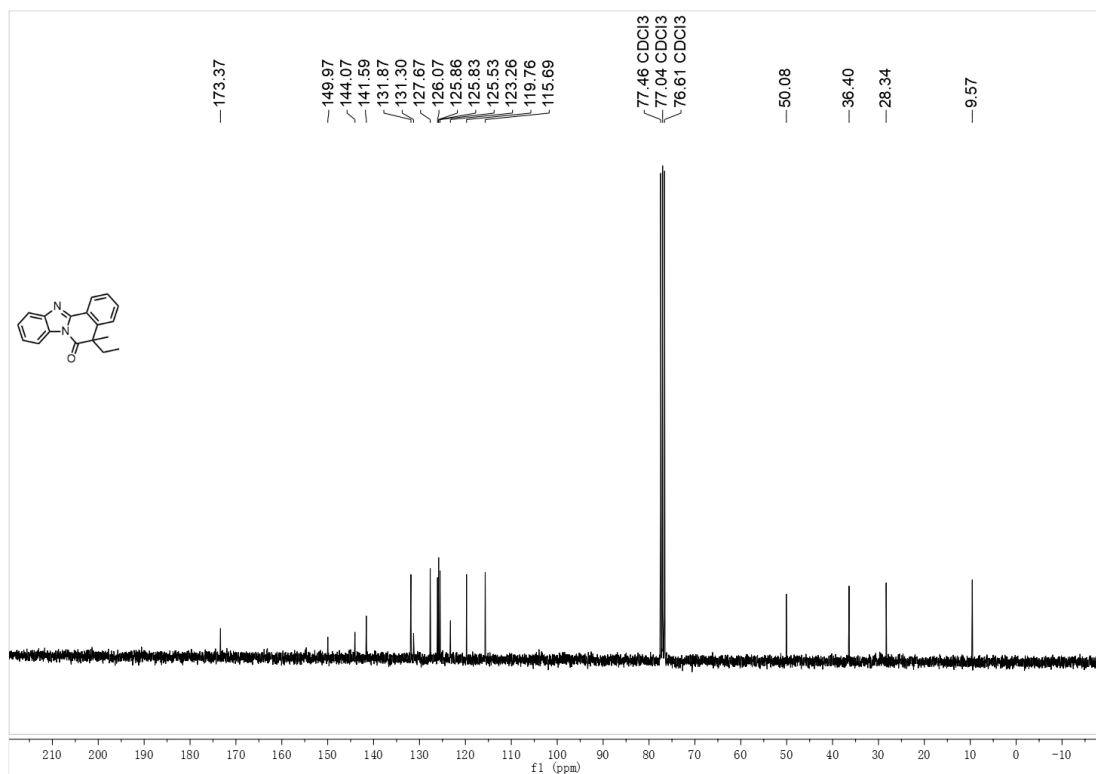

<sup>13</sup>C NMR (150 MHz, CDCl<sub>3</sub>) spectrum of **21**

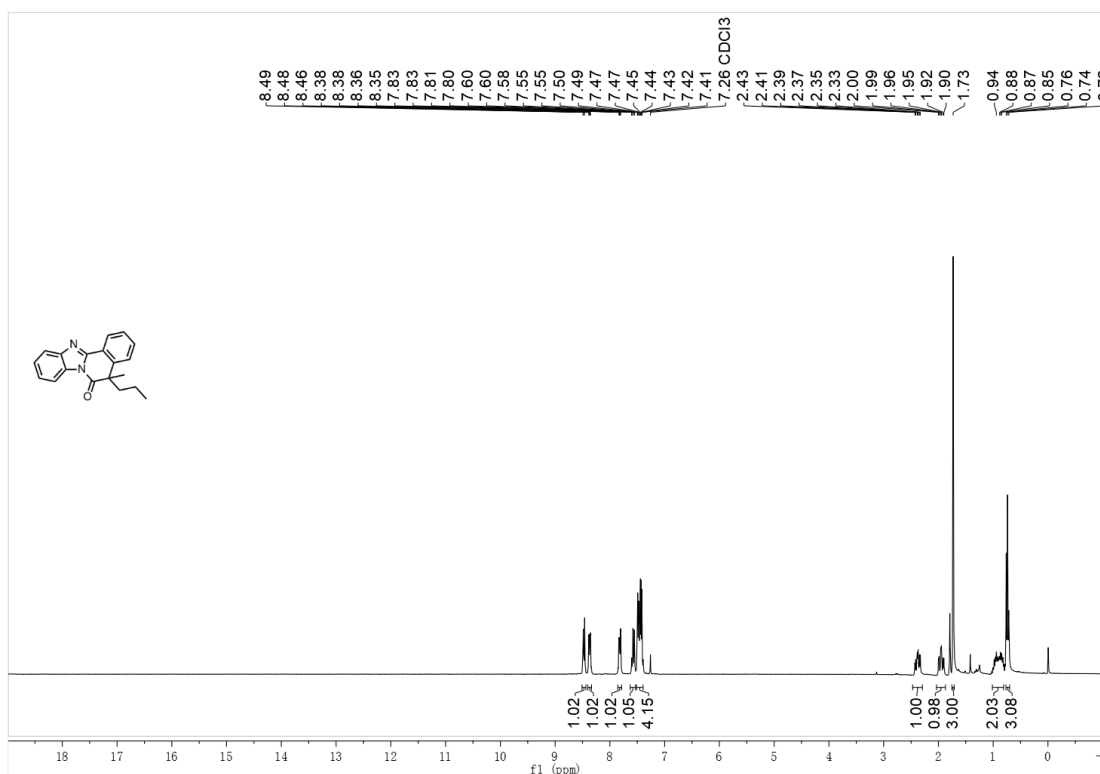

<sup>1</sup>H NMR (600 MHz, CDCl<sub>3</sub>) spectrum of **22**

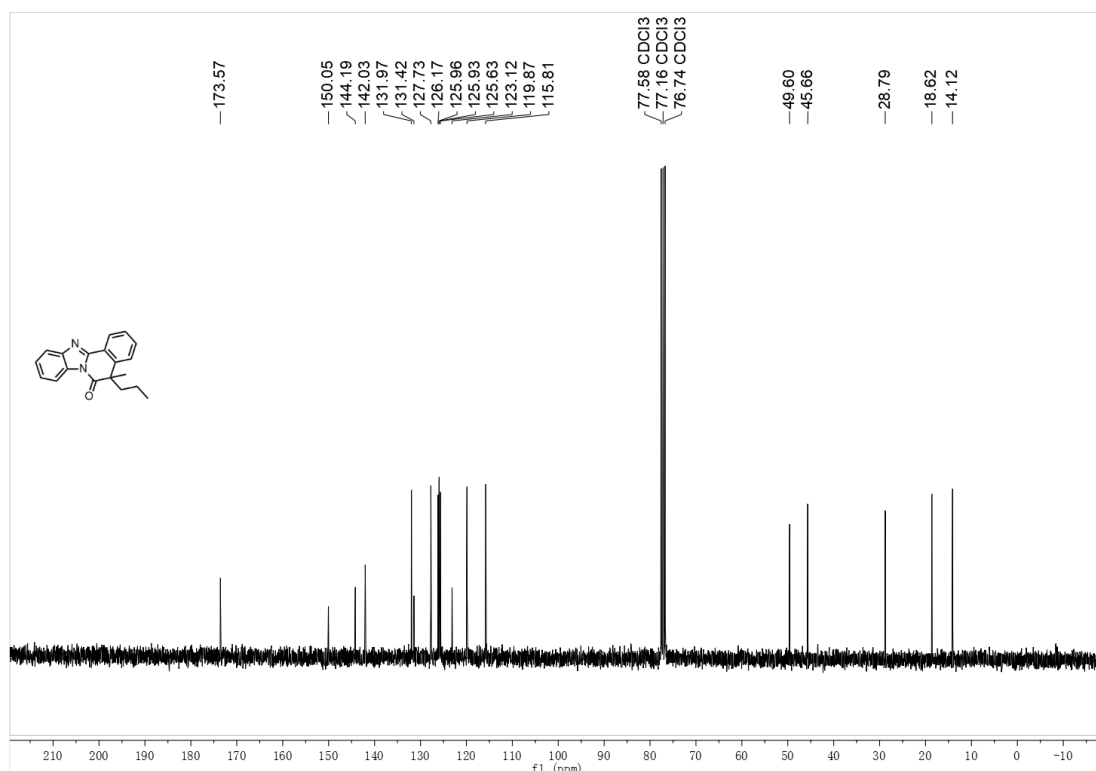

<sup>13</sup>C NMR (150 MHz, CDCl<sub>3</sub>) spectrum of **22**

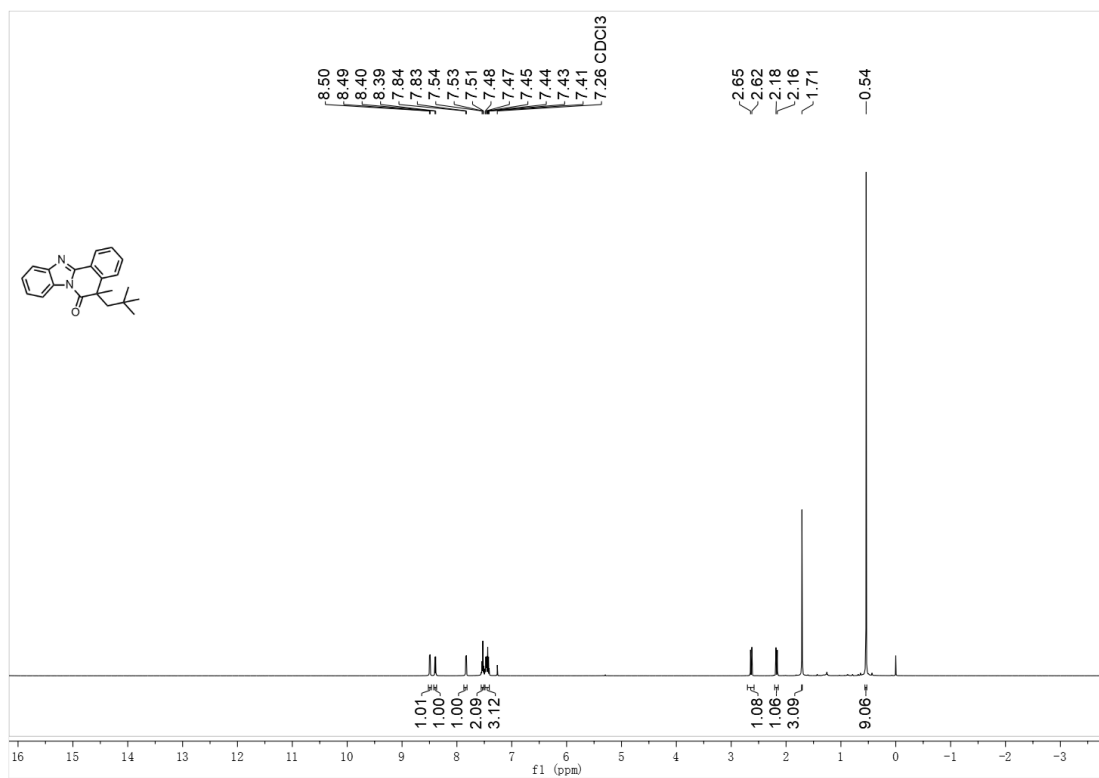

$^1\text{H}$  NMR (600 MHz,  $\text{CDCl}_3$ ) spectrum of **23**

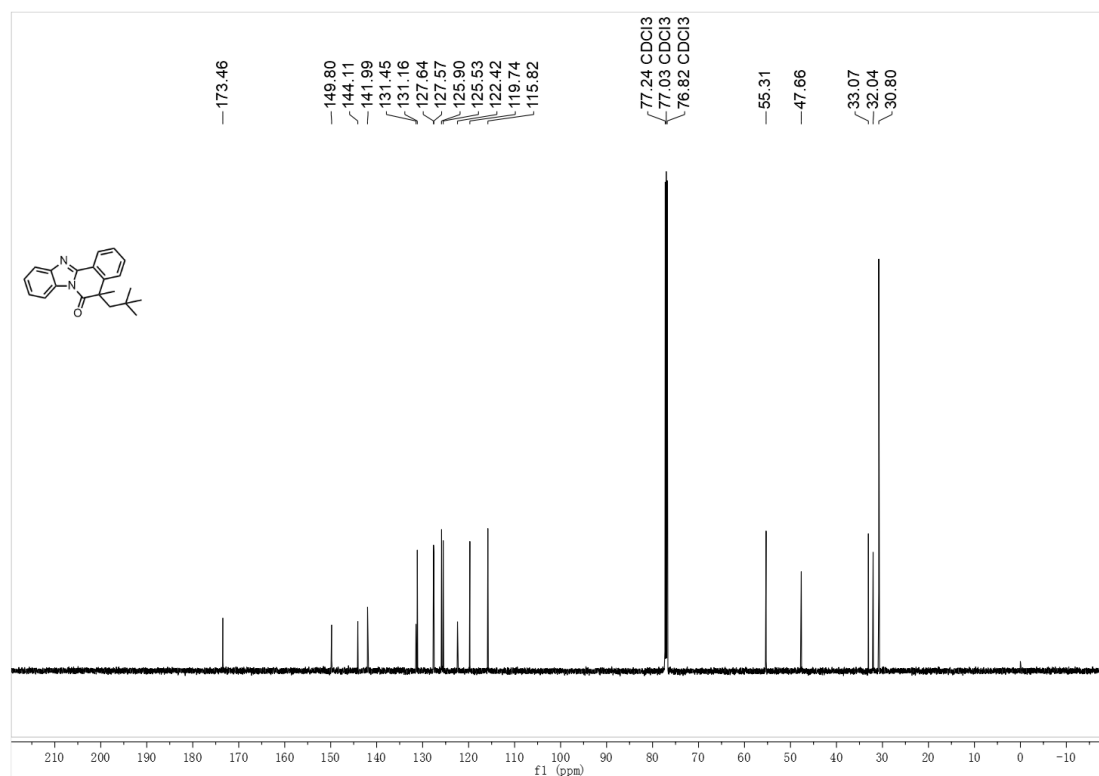

$^{13}\text{C}$  NMR (150 MHz,  $\text{CDCl}_3$ ) spectrum of **23**

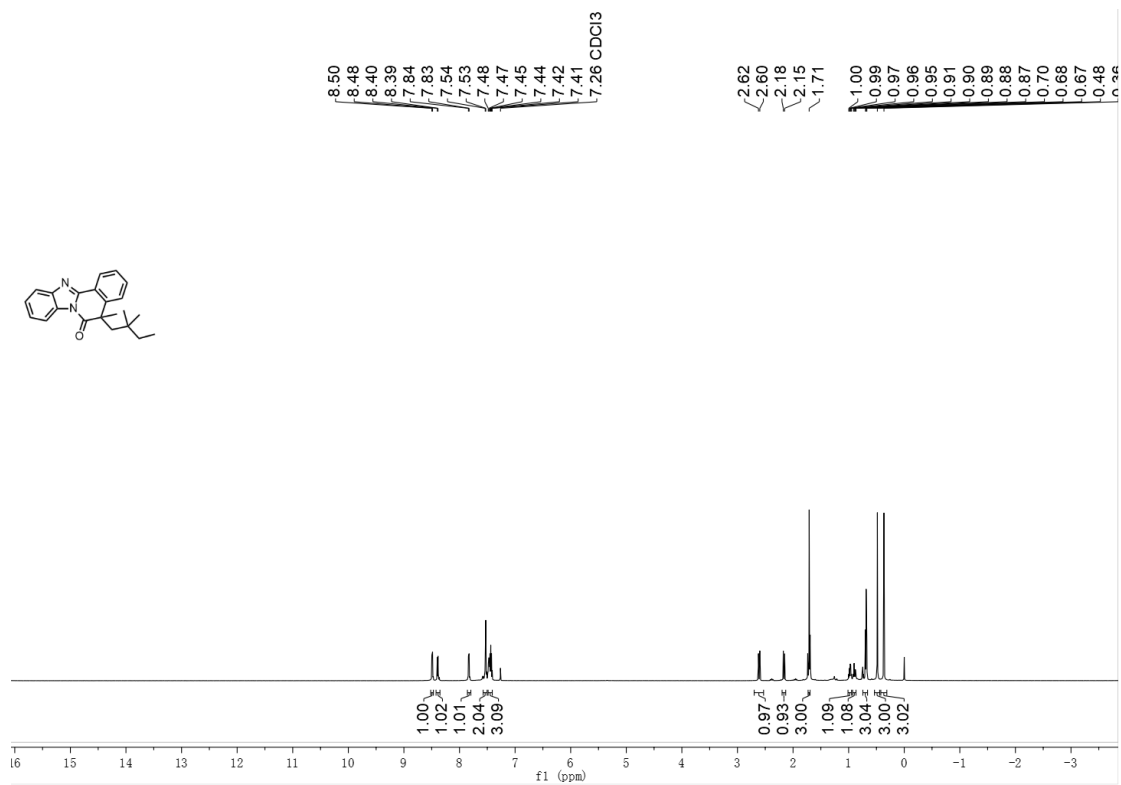

<sup>1</sup>H NMR (600 MHz, CDCl<sub>3</sub>) spectrum of **24**

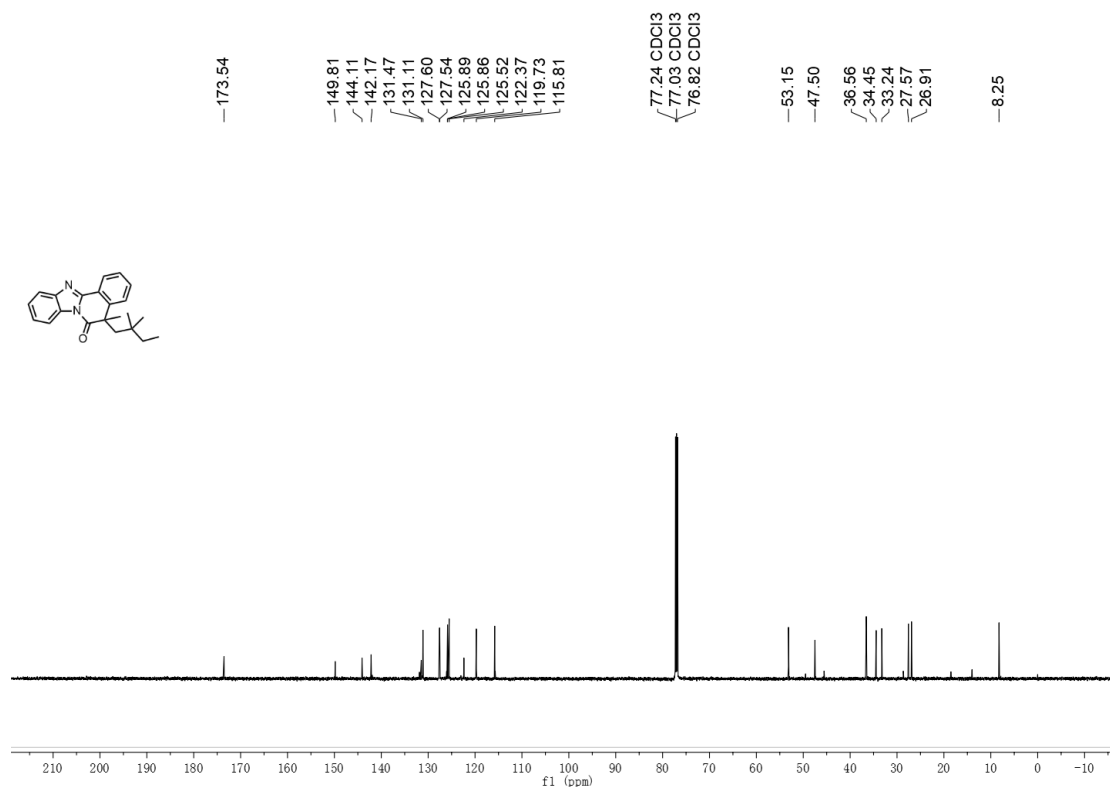

<sup>13</sup>C NMR (150 MHz, CDCl<sub>3</sub>) spectrum of **24**

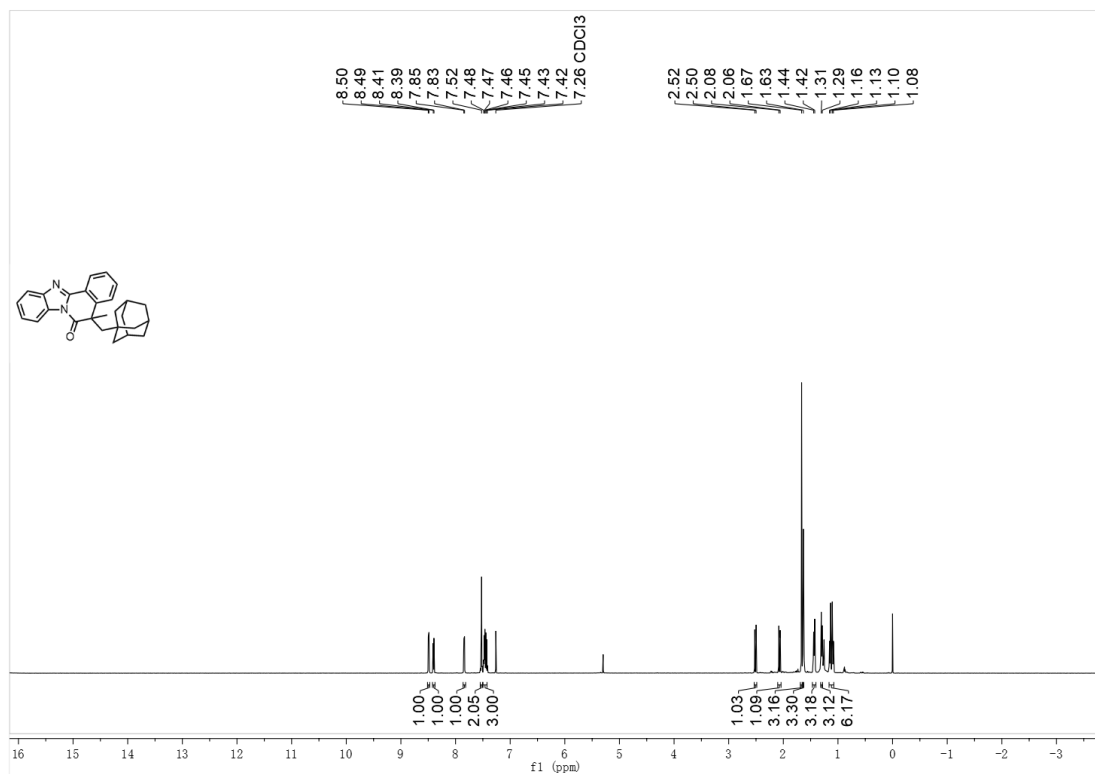

<sup>1</sup>H NMR (600 MHz, CDCl<sub>3</sub>) spectrum of **25**

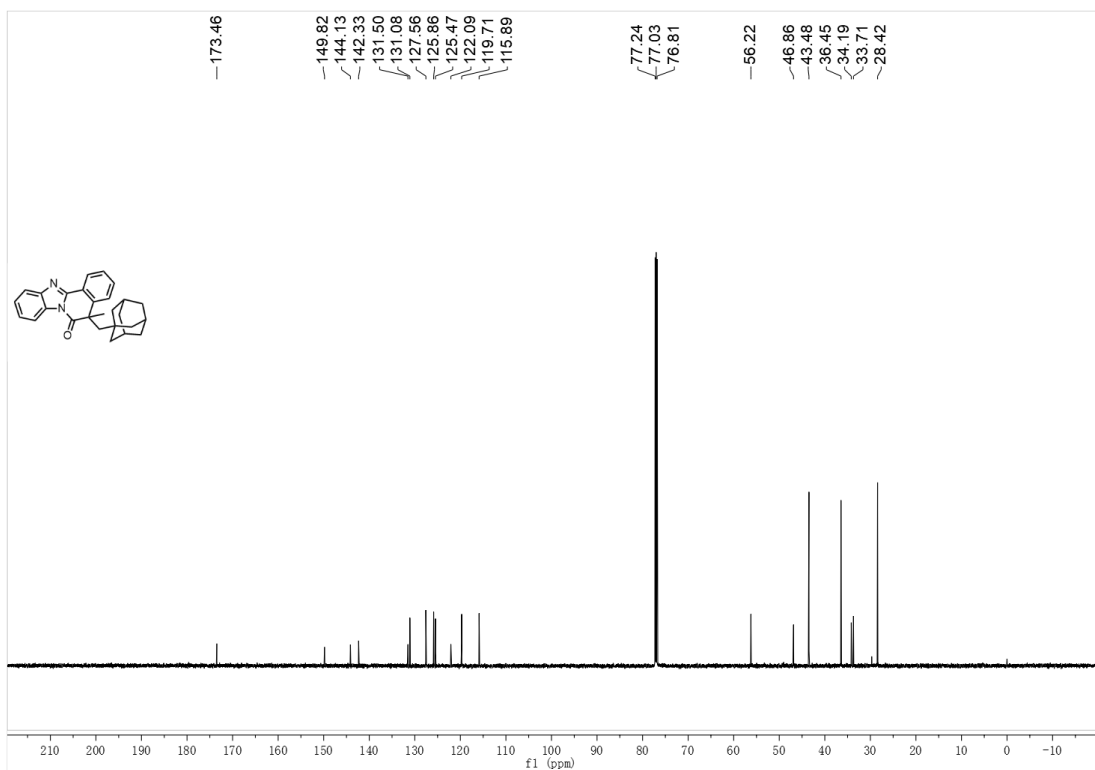

<sup>13</sup>C NMR (150 MHz, CDCl<sub>3</sub>) spectrum of **25**







## 8. References

- [1] D. R. Stuart, E. Villemure, K. Fagnou, *J. Am. Chem. Soc.* **2007**, *129*, 12072.
- [2] Y. Yuan, Y. F. Zheng, B. Z. Xu, J. P. Liao, F. X. Bu, S. C. Wang, J. G. Hu, A. W. Lei, *ACS Catal.* **2020**, *10*, 6676.
- [3] K. Sun, S. J. Li, X. L. Chen, Y. Liu, X. Q. Huang, D. H. Wei, L. B. Qu, Y. F. Zhao, B. Yu, *Chem. Commun.* **2019**, *55*, 2861.
- [4] Z. M. Tan, Y. Y. Jiang, K. Xu, C. C. Zeng, *J. Catal.* **2023**, *417*, 473.
- [5] B. Zhao, G. B. Hammond, B. Xu, *J. Org. Chem.* **2021**, *86*, 12851.
- [6] J. Z. Li, L. Mei, X. E. Cai, C. C. Zhang, T. T. Cao, X. J. Huang, Y. L. Liu, W. T. Wei, *Adv. Synth. Catal.* **2022**, *364*, 2080.
